## 1 **Common Mechanism of SARS-CoV and SARS-CoV-2 Pathogenesis across Species**

2  
3 Alexandra Schäfer<sup>1\*#</sup>, Lisa E. Gralinski<sup>1\*</sup>, Sarah R. Leist<sup>1\*</sup>, Emma S. Winkler<sup>2,3</sup>, Brea K.  
4 Hampton<sup>4,5</sup>, Michael A. Mooney<sup>6,7,8</sup>, Kara L. Jensen<sup>1</sup>, Rachel L. Graham<sup>1</sup>, Sudhakar  
5 Agnihothram<sup>1</sup>, Sophia Jeng<sup>6,9</sup>, Steven Chamberlin<sup>7,8</sup>, Timothy A. Bell<sup>4</sup>, D. Trevor Scobey<sup>1</sup>, Laura  
6 A. VanBlargan<sup>2</sup>, Larissa B. Thackray<sup>2</sup>, Pablo Hock<sup>4</sup>, Darla R. Miller<sup>4,10</sup>, Ginger D. Shaw<sup>4,10</sup>,  
7 Fernando Pardo Manuel de Villena<sup>4</sup>, Shannon K. McWeeney<sup>6,7,8,9</sup>, Stephanie A. Montgomery<sup>10,11</sup>,  
8 Michael S. Diamond<sup>2,3,12</sup>, Mark T. Heise<sup>4,13,17</sup>, Vineet D. Menachery<sup>14,15,16</sup>, Martin T. Ferris<sup>4#</sup>,  
9 Ralph S. Baric<sup>1,13,17#</sup>

10  
11 <sup>1</sup>Department of Epidemiology, University of North Carolina at Chapel Hill, Chapel Hill, NC, USA

12 <sup>2</sup>Department of Medicine, Washington University School of Medicine, St. Louis, MO, USA

13 <sup>3</sup>Department of Pathology & Immunology, Washington University School of Medicine, St. Louis,  
14 MO, USA

15 <sup>4</sup>Department of Genetics, University of North Carolina at Chapel Hill, Chapel Hill, NC, USA

16 <sup>5</sup>Curriculum in Genetics and Molecular Biology, University of North Carolina at Chapel Hill, Chapel  
17 Hill, NC, USA

18 <sup>6</sup>Knight Cancer Institute, Oregon Health & Science University, Portland, OR, USA

19 <sup>7</sup>Division of Bioinformatics and Computational Biology, Oregon Health & Science University,  
20 Portland, OR, USA

21 <sup>8</sup>Department of Medical Informatics and Clinical Epidemiology, Oregon Health & Science  
22 University, Portland, OR, USA

23 <sup>9</sup>Oregon Clinical and Translational Research Institute, Oregon Health & Science University,  
24 Portland, OR, USA

25 <sup>10</sup>Lineberger Comprehensive Cancer Center, University of North Carolina at Chapel Hill, Chapel  
26 Hill, NC, USA

27 <sup>11</sup>Department of Pathology and Laboratory Medicine, University of North Carolina at Chapel Hill,  
28 Chapel Hill, NC

29 <sup>12</sup>Department of Molecular Microbiology, Washington University School of Medicine, St. Louis,  
30 MO, USA

31 <sup>13</sup>Department of Microbiology and Immunology, University of North Carolina at Chapel Hill, Chapel  
32 Hill, NC, USA

33 <sup>14</sup>Department of Microbiology and Immunology, University of Texas Medical Branch, Galveston,  
34 TX, USA

35 <sup>15</sup>Institute for Human Infection and Immunity, University of Texas Medical Branch, Galveston TX,  
36 USA

37 <sup>16</sup>Department of Pathology and Center for Biodefense & Emerging Infectious Diseases, University  
38 of Texas Medical Branch, Galveston, TX, USA

39 <sup>17</sup>Rapidly Emerging Antiviral Drug Discovery Initiative, University of North Carolina, Chapel Hill  
40 NC, USA

41  
42 \* Co-first authors

43 + Co-senior authors

44

45

## 46 **Abstract**

47 Sarbecovirus (CoV) infections, including Severe Acute Respiratory CoV (SARS-CoV) and SARS-  
48 CoV-2, are considerable human threats. Human GWAS studies have recently identified loci  
49 associated with variation in SARS-CoV-2 susceptibility. However, genetically tractable models  
50 that reproduce human CoV disease outcomes are needed to mechanistically evaluate genetic  
51 determinants of CoV susceptibility. We used the Collaborative Cross (CC) and human GWAS  
52 datasets to elucidate host susceptibility loci that regulate CoV infections and to identify host  
53 quantitative trait loci that modulate severe CoV and pan-CoV disease outcomes including a major  
54 disease regulating loci including *CCR9*. *CCR9* ablation resulted in enhanced titer, weight loss,  
55 respiratory dysfunction, mortality, and inflammation, providing mechanistic support in mitigating  
56 protection from severe SARS-CoV-2 pathogenesis across species. This study represents a  
57 comprehensive analysis of susceptibility loci for an entire genus of human pathogens conducted,  
58 identifies a large collection of susceptibility loci and candidate genes that regulate multiple aspects  
59 type-specific and cross-CoV pathogenesis, and also validates the paradigm of using the CC  
60 platform to identify common cross-species susceptibility loci and genes for newly emerging and  
61 pre-epidemic viruses.

62

## 63 **Main Text**

64 Natural host genetic variation regulates disease severity following most viral infections, yet the  
65 specific genes and loci that regulate differential disease outcomes are largely unknown across  
66 susceptible species<sup>1,2</sup>. Coronaviruses (CoVs) are significant human and animal pathogens; six  
67 CoVs (three human, three swine) have emerged or expanded their geographic range in the 21<sup>st</sup>  
68 century<sup>3,4</sup>. The most impactful emergent human CoVs (SARS-CoV and SARS-CoV-2) are group

69 2B coronaviruses, which likely emerged from bats to cause worldwide human epidemic or  
70 pandemic respiratory infections, leading to substantial morbidity and mortality<sup>5,6</sup>. Moreover, many  
71 high-risk group 2B Sarbecoviruses (SARS-like viruses) and group 2C MERS-like bat CoVs are  
72 poised for future human emergence events<sup>7-9</sup>. The Sarbecovirus subgenus is clustered into four  
73 clades that include the clade I SARS-CoV and high-risk SARS-like Bat CoVs (BtCoV), clade II  
74 SARS-like BtCoVs like HKU3, and clade III SARS-CoV-2 (**Figure 1a**)<sup>10</sup>. Sarbecoviruses vary  
75 widely in their ability to cause human and animal disease<sup>11</sup>. SARS-CoV caused ~8,000 infections  
76 with a 10% mortality rate, while SARS-CoV-2 has infected ~132 million, leading to ~2.9 million  
77 deaths to date<sup>12,13</sup>. SARS-CoV-2 infections cause asymptomatic to life-threatening disease  
78 outcomes, supporting a role for inter-host genetic control of emerging viral disease outcomes in  
79 both humans and mice<sup>14-16</sup>. Thus, understanding the functions of natural host variants in genes  
80 that regulate susceptibility and disease severity after diverse Sarbecovirus infections may reveal  
81 common genetic loci that regulate wildtype and variant virus pathogenic outcomes across  
82 species, inform threat potential, and reveal novel targets for therapeutic intervention.

83  
84 The angiotensin-converting enzyme 2 (ACE2) receptor interacts with the Spike protein (S)  
85 receptor binding domains of SARS-CoV, SARS-CoV-2 and many BtCoV Sarbecoviruses, but not  
86 the clade II HKU3 strain (**Figure 1b**)<sup>17</sup>. As many of these strains do not produce disease in mice,  
87 reverse genetics and serial passaging were used to select for SARS-CoV-MA15 (SARS-MA),  
88 HKU3-MA, and SARS-CoV-2 MA10 strains that replicate efficiently and produce severe disease  
89 in mice<sup>11,18,19,20</sup>. Mouse genetic reference populations (GRPs) have been employed as highly  
90 relevant models of human disease, and coupled with systems genetics data algorithms, to identify  
91 host susceptibility loci, genes, genetic networks and higher-level genetic interactions that regulate  
92 phenotypic variation and disease severity<sup>21-23</sup>. Among these mouse GRPs, the Collaborative  
93 Cross (CC) genetic reference population encodes over 44 million single nucleotide  
94 polymorphisms (SNPs), 4 million insertions and deletions (InDels), as well as several thousand  
95 novel variants (both SNPs as well as InDels) present in single strains<sup>24,25</sup>. Building from our prior  
96 work, genetically mapping quantitative trait loci in incipient mice from CC strains (Pre-CC<sup>26</sup>, **Table**  
97 **1**), we designed a panel of 115 F1 crosses between different CC strains (CC-RIX; an outbred  
98 population, like humans, but reproducible (**Figure 1c**)) to identify loci controlling Sarbecovirus  
99 pathogenesis and adaptive immune responses. We used our mouse-adapted CoV models,  
100 including SARS-CoV MA15 (SARS-MA), HKU3-MA, and SARS-CoV-2 MA10, which replicate  
101 efficiently and produce severe disease in mice<sup>11,18,19,20</sup>, to overcome the host-specific angiotensin-  
102 converting enzyme 2 (ACE-2) interaction with CoV Spike protein.

103

## 104 **Results**

### 105 **Phenotypic distributions, genomics scans, and allele effects maps for 3 traits across the** 106 **CC-RIX.**

107 We infected the CC-RIX population with two genetically distinct Sarbecoviruses, which included  
108 the clade I SARS-MA and clade II HKU3-MA strains, respectively (**Figure 1a-b**)<sup>11,27</sup>. Groups of  
109 CC-RIX mice were inoculated with  $5 \times 10^3$  plaque-forming units (PFU) of SARS-MA, and viral  
110 burden, clinical disease (e.g., weight loss, mortality, and respiratory function), antibody titers, and  
111 immune cell infiltrates were measured at multiple timepoints post-infection (ranging from 2-32  
112 days) (**Figure 1d, Figure 2**). A matched cohort of CC-RIX was inoculated with  $1 \times 10^5$  PFU of  
113 HKU3-MA and evaluated for mortality and weight loss through day 4 post infection (**Figure 2a**).  
114 In both studies, virus challenge elicited an array of disease phenotypes, ranging from clinically  
115 inapparent infection to lethal outcomes within the first 4 days of infection. We estimated genetic  
116 contributions for many of these traits and determined that heritability for these responses was  
117 44.4%-80.9%, estimates that agree with previous CC studies<sup>26,28-31</sup>. Importantly, the various CC-  
118 RIX disease phenotypes measured in response to infection appeared relatively uncorrelated  
119 (**Figure 2a-c**), suggesting that there are many independent genetic factors driving these  
120 responses. We next conducted genetic mapping to identify both genomic regions and specific  
121 founder haplotypes driving various aspects of SARS-MA and HKU3-MA disease responses.  
122 Given the likely complex genetic architecture underlying these phenotypes, we identified those  
123 loci surpassing community-accepted significance thresholds ( $p < 0.33$ ), with distinct allele effects  
124 (**Figure 2a-c, Table 1**)<sup>32</sup>. We identified 11 distinct and high-confidence loci in our RIX population  
125 affecting weight loss, mortality, titer, antibody responses or respiratory function after SARS-MA  
126 infection or weight loss and mortality following HKU3-MA infection. The effect sizes of these loci  
127 varied from 3-23% of the total trait variation (that is, largely moderate effect sizes), the loci were  
128 located in different genomic regions with different causal founder alleles, and most loci primarily  
129 impacted one or a few traits in this population (**Table 1**). The number of independent loci and their  
130 trait-specific impacts are consistent with our earlier observations of little to no correlation between  
131 disease states across the RIX lines (**Figure 2a-c**). Together, this analysis highlights the genetic  
132 complexity driving CoV disease outcomes and immunity and also the inability of any single animal  
133 model of CoV disease to fully address all aspects of the disease response.

134

135 To investigate the possibility of pan-sarbecovirus susceptibility loci, we evaluated whether any of  
136 our SARS-MA phenotypes also were associated with the haplotypes driving HKU3-MA mortality

137 **(Figure 2d, Table 1)**. For these analyses, we binned CC-RIX lines based on their diplotypes at  
138 these HKU3-MA diseases associated loci, then determined whether these diplotype bins provided  
139 an improved fit to the relationship between SARS-MA phenotypes and the CC-RIX IDs  
140 themselves. For example, was there any genetic signal at quantitative trait loci (QTL) *HrS10* or  
141 *HrS11* that was associated with differential SARS-MA disease when simplifying the underlying  
142 causal model; a method we have used to find additional QTLs with small effect sizes in genetically  
143 complex populations<sup>29</sup>. *HrS10* was associated with enhanced SARS-MA weight loss, disease and  
144 mortality at day 2 post-infection (2 dpi), whereas *HrS11* had moderate associations with SARS-  
145 MA lung titers at both 2 and 4 dpi (**Figure 2d**). These results indicate that common susceptibility  
146 loci regulate disease severity across two genetically distinct Sarbecovirus clades, and that *HrS10*  
147 and *HrS11* are both associated with HKU3-MA-induced mortality, but likely contribute to virus-  
148 induced disease through different mechanisms.

149

#### 150 **Disease phenotypes in parental strains CC011 and CC074 and identification of a** 151 **quantitative multitrait locus on chromosome 9 in the CC011xCC074-F2.**

152 Concurrent with our large CC-RIX screen, we identified a pair of inbred CC strains showing highly  
153 divergent susceptibilities to SARS-CoV: the disease resistant CC011/Unc and the highly  
154 susceptible CC074/Unc strain (CC011 and CC074 from here on, respectively). After challenge  
155 with  $1 \times 10^4$  PFU SARS-MA, these strains exhibited marked differences in clinical and virological  
156 disease phenotypes (e.g., hemorrhage, weight loss, virus titer, mortality, circulating immune  
157 cells), and all CC074 mice developed lethal disease by 4 dpi post infection (**Figure 3a, left panel**).  
158 Relevant for the current pandemic, these parental strains showed similar severe infection  
159 phenotypes during SARS-CoV-2 MA10 infection (**Figure 3a, right panel, Figure S1**). We  
160 generated 403 F2 mice by intercrossing these strains (**Figure S2**) and inoculated them  
161 intranasally at 9-12 weeks with  $1 \times 10^4$  PFU of SARS-MA. These F2 mice showed an expanded  
162 range of disease responses relative to their parent CC strains, including mortality, weight loss,  
163 titer, respiratory function, circulating immune cell and hemorrhage phenotypes (**Figure S3, Figure**  
164 **3b**). We conducted QTL mapping in these F2 mice and identified five significant QTL segregating  
165 in this population (*HrS24-28*, **Table 1**), and supply information on other potential loci ( $p < 0.33$ ,  
166 **Table S1**). Most of these loci impacted multiple aspects of the SARS-MA disease response during  
167 this infection time course (for example analysis of *HrS26* on chromosome 9 indicated the locus  
168 contributed to mortality at 4 dpi (Odds ratio (OR) of 3.15), as well as lung hemorrhage or  
169 congestion (10.2% of population variation), airflow restriction at 2 dpi (7.8% PenH), as well as  
170 peripheral neutrophil (11.8%) and lymphocyte (12.4%) levels) at 4 dpi (**Figure 3c, Table 1**).

171 Recently, three Genome-wide Association Study (GWAS) in humans identified a locus associated  
172 with respiratory failure. This locus (encompassing genes such as *SLC6A20*, *LZTFL1*, *FYCO1*,  
173 *CXCR6*, *XCR1*, and *CCR9*) is syntenous with a more proximal region of our chromosome 9  
174 locus<sup>33-35</sup>. *CCR9* emerged as a strong candidate based on the integration of our data with these  
175 studies and the presence of nonsynonymous SNPs in *CCR9* as well as synonymous mutations  
176 in regulatory flanking sequences.

177  
178 **Identification of *CCR9* as a major susceptibility allele during SARS-CoV-2 infection.**

179 To better understand how our contrasting CC strains and this locus regulates SARS-CoV-2  
180 disease, we inoculated CC011, CC074, C57BL/6NJ and *CCR9*<sup>-/-</sup> mice on a C57BL/6NJ  
181 background with SARS-CoV-2 MA10<sup>20</sup>. CC011 and CC074 mice infected with SARS-CoV-2  
182 MA10 showed concordance in their SARS- MA disease response phenotypes, including lethality  
183 in the CC074 susceptible line. The *CCR9*<sup>-/-</sup> mice developed more severe clinical disease (**Figure**  
184 **4a, Figure S4a**), exhibited increased virus titers (**Figure 4b**), weight loss, mortality and prolonged  
185 pulmonary dysfunction and severe lung pathology as measured by whole body plethysmography  
186 (**Figure 4c**), lung hemorrhage (**Figure S4b**), and lung damage (**Figure S4c, d and Figure S4e**)  
187 relative to their wild-type controls, supporting its important role in protection from disease.  
188 Analysis of the cytokine profile in lungs and serum by multiplex immune-assay showed increased  
189 subsets of cytokines and chemokines that are involved in promoting allergic airway inflammation,  
190 including IL9, IL13, IL17, CCL2, CCL3, CCL5, G-CSF, and Eotaxin either in the lung tissue, serum,  
191 or both (**Figure 4f and Figure S5b**). By flow cytometric analysis, the composition of infiltrating  
192 cells into the lung tissue (**Figure 4e**) and bronchoalveolar (BAL) fluid (**Figure S5a**) of *CCR9*<sup>-/-</sup>  
193 mice showed a significant increase of CD4<sup>+</sup> T cells, CD8<sup>+</sup> effector T cells, inflammation-promoting  
194 CD11<sup>+</sup> DCs and eosinophils at 6 dpi, consistent with an allergic airway inflammatory response.  
195 Although originally found to play an important role in chronic gut inflammation, *CCR9* is mainly  
196 expressed on lymphocytes, dendritic cells (DCs) and monocytes/macrophages<sup>36,37</sup>, and also  
197 participates in early allergic airway inflammation including the migration and proliferation of  
198 eosinophils and lymphocytes<sup>38</sup>. In addition *CCR9*<sup>+</sup> DCs are implicated in regulating inflammation,  
199 alloimmunity, and autoimmunity<sup>36</sup>. *CCR9*<sup>-/-</sup> mice develop chronic inflammatory responses and  
200 CD11b<sup>+</sup> inflammatory macrophages contribute to the pathogenesis of liver fibrosis via the  
201 *CCR9/CCL25* axis<sup>39,40</sup>. As inflammatory macrophages contribute significantly to increased SARS-  
202 CoV pathogenesis in mice<sup>41</sup>, together, these data target the *CCR9/CCL25* axis as a major driver  
203 of SARS-CoV-2 pathogenesis across species and validate *CCR9* as a driver of the human Chr3  
204 susceptibility loci and mouse Chr9 susceptibility locus.

205 A key goal in animal studies is to identify relevant models of human disease. Syntenic genome  
206 regions between humans and rodents often regulate a number of infectious and chronic diseases,  
207 and our analysis of *HrS26* extends this important pattern<sup>42-44</sup> to sarbecovirus infections. All told,  
208 the synteny between human Chr3 and mouse Chr9, the effect sizes of the loci identified in this F2  
209 (between 5-15% of the population-wide phenotypic variation in this F2, **Table 1**), as well as the  
210 prevalence of loci impacting multiple aspects of SARS-MA associated disease, highlight how  
211 sorting of multiple susceptibility alleles into individual CC strains model unique aspects of the  
212 genetic control of disease responses. Furthermore, the presence of alleles of at least six of the  
213 CC founder strains segregating across these loci (and often in opposite directions: a C57BL/6J  
214 allele is protective at *HrS26* and *HrS27* but exacerbating at *HrS28*, **Table 1**) highlights the utility  
215 of using genetically complex but reproducible models of disease.

216  
217 **Identification of major effect locus on chromosome 4 and of *Trim14* as a susceptibility**  
218 **gene during SARS-MA and SARS-CoV-2 MA10 infection.**

219 Next, we revisited a previous CC-F2 intercross, CC003/UncxCC053/Unc (named CC003 and  
220 CC053 from here on) conducted by our group<sup>45</sup>, and utilized our refined analysis pipelines once  
221 the original SARS-MA disease loci (*HrS5-9*) were statistically accounted for. This re-analysis  
222 allowed us to identify an additional locus (*HrS23* on chr4) impacting both weight loss and  
223 hemorrhagic damage to the lungs as determined by gross pathology (**Figure 5a, b**), as well as  
224 several other suggestive QTLs (**Table S1**). The chr4 locus also overlapped with the mortality QTL  
225 *HrS24* identified in CC011xCC074-F2 cross (**Figure 5c**). SNP variation between CC003 and  
226 CC053, as well as between CC011 and CC074 in this locus pointed to *Trim14* as a likely candidate  
227 gene driving these differences in SARS-CoV disease. Previous work identified *Trim14* as a key  
228 docking platform in the context of MAVS signaling<sup>46,47</sup>. We used CRISPR/Cas9 targeting to edit  
229 *Trim14* in C57BL/6J mice, create a functional knockout (**Figure S6**), and evaluate its role following  
230 infection (**Figure 5d, top panel**). *Trim14*<sup>Δ47/Δ47</sup> mice inoculated with 1x10<sup>5</sup> PFU of SARS-MA had  
231 a modest increase in pathogenesis relative to C57BL/6J control mice. At 3 and 4 dpi, *Trim14*-  
232 deficient mice had increased weight loss, which corresponded with increases in viral titer within  
233 the lung at 2 and 4 dpi. This result show that an absence of *Trim14* affects viral clearance.  
234 Similarly, *Trim14*<sup>Δ47/Δ47</sup> mice inoculated with SARS-CoV-2 MA10 also sustained modest increases  
235 in weight loss and a delayed recovery phenotype when compared to C57BL/6 mice (**Figure 5d,**  
236 **bottom panel**). However, the difference in viral titer seen at early times post SARS-MA infection  
237 was not observed with SARS-CoV-2 MA10. Together, these data suggest that *Trim14* has a  
238 shared role in attenuating Sarbecovirus disease potential, but that this effect varies between

239 viruses. Taken together, the data demonstrates the potential of identifying common and shared  
240 QTLs among group 2B coronaviruses.

241

## 242 **Discussion**

243 Across these studies, we describe several dozen loci impacting different disease responses,  
244 including several which show broad responses to all tested Sarbecoviruses. We demonstrate  
245 connections to human GWAS studies, and as such these data represent a resource for future  
246 comparative studies of Sarbecovirus pathogenesis between humans and animals. Our study  
247 highlights the power of using animal GRPs to understand the role of host genetic variation on  
248 infectious diseases, generate new models of differential disease, probe the role of individual  
249 genes in disease progression, and provide mechanistic insight into the role of specific host genes  
250 and viral strains in regulating pathogenesis across species. In appropriately selected large  
251 population screens, highly penetrant genetic variants can be identified easily, as can their impacts  
252 on specific aspects of disease outcome. In contrast, targeted mapping crosses between highly  
253 discordant strains can help to identify more complex genetic interaction networks such as variants  
254 that are penetrant only in the context of specific genetic backgrounds, or epistatic (gene-gene)  
255 interaction networks.

256

257 We leveraged large-scale population mapping as well as focused intercrosses to better  
258 characterize the genetic susceptibility landscape of Sarbecovirus infections in mouse models<sup>26,45</sup>  
259 and demonstrated that a large number of polymorphic loci (**Figure 6**) regulate the host disease  
260 responses to this subgroup of coronaviruses. Moreover, in this study and others, we have  
261 identified specific genes (*Trim55*<sup>26</sup>, *Ticam2*<sup>45</sup>, and here *Trim14* and *CCR9*), which have naturally  
262 occurring polymorphisms driving aberrant SARS-CoV disease responses. Importantly, we  
263 demonstrate that *HrS10* and *HrS11* influence disease severity following both clade I SARS-MA  
264 and clade II HKU3-MA infection in the CC-RIX, supporting the hypothesis that intrinsic virulence  
265 properties encoded within the Sarbecoviruses are subject to similar susceptibility loci in mammals.  
266 Further, the concordant susceptibility profiles of CC011, CC074, *Trim14* and *CCR9* deficient mice  
267 with SARS-MA and SARS-CoV-2 MA10 highlight the utility of pre-emergence disease models.  
268 Such findings are consistent with the discovery that group I and II human norovirus infection and  
269 pathogenesis are heavily regulated by polymorphisms in fucosyltransferase 2 (*FUT2*)<sup>48</sup>. Rich and  
270 complex datasets like the ones described here enable comparisons with human GWAS studies  
271 mapping QTL after SARS-CoV-2 infection<sup>33-35</sup>. The CC platform can be used to evaluate the role  
272 of these loci in mouse models. One advantage of our approach is the use of different mapping



273 platforms, which provide opportunities to combine datasets across projects to gain a greater  
274 understanding of the role of how host genetic variation modulates CoV disease responses in  
275 mammals (**Figure 6, Table 1**). In addition, the unexplained heritability and suggestive loci (**Table**  
276 **S1**) we have identified, suggests that CoV disease and immunity are complex polygenic traits,  
277 with the accumulation of variants across many loci driving final disease susceptibility. Collectively,  
278 these studies represent the most comprehensive analysis of susceptibility loci for an entire genus  
279 of human pathogens, identify a large collection of susceptibility loci and candidate genes that  
280 regulate multiple aspects type-specific and cross-CoV pathogenesis, validate a role for the CCR9-  
281 CCL25 axis in regulating SARS-CoV-2 disease severity and provide a resource for community  
282 wide studies.

283

## 284 **Figure Legends**

285 **Figure 1. Coronavirus and host- genetic model systems: a-b. Spike phylogeny of**  
286 **representative coronaviruses and RBD alignments SARS-CoV, HKU3, and SARS-CoV-2**  
287 **with emphasize on ACE2 binding residues; c.-d. The RIX Collaborative Cross Screen: The**  
288 **design of CC-RIX panel and the phenotypic distribution of disease phenotypes after SARS-**  
289 **MA and HKU3-MA infection in the CC-RIX panel**

290 **a.** The Spike protein sequences of selected coronaviruses were aligned and phylogenetically  
291 compared. Coronavirus genera are grouped by classic subgroup designations (1a-b, 2a-d, 3, and  
292 4). PECOv is designated as 1b\* because of its distinctive grouping compared with more  
293 conserved proteins. Branches in each tree are labeled with consensus support values (in %).  
294 Sequences were aligned using free end gaps with the Blosum62 cost matrix, and the tree was  
295 constructed using the neighbor-joining method based on the multiple sequence alignment in  
296 Geneious Prime. Numbers following the underscores in each sequence correspond to the  
297 GenBank Accession number. **b.** Spike receptor-binding domain (RBD) alignments were  
298 performed in Geneious using free end gaps with the Blosum62 cost matrix, and 14 ACE2-critical  
299 interacting residues are highlighted in the chart. Residues in the chart are color-coded based on  
300 conservation to the SARS-CoV residue (conservation based on Blosum62). **c.** The Collaborative  
301 Cross is an octo-parental genetic reference panel. The population captures ~40 million SNPs and  
302 small InDels without blind spots across the genome. Each individual strain's unique combination  
303 of haplotypes across the genome results from the independent recombinations each strain  
304 experienced in their generation. As such, each CC strain represents a unique combination of  
305 Coronavirus susceptibility alleles. **d.** Phenotype distribution in CC-RIX panel during SARS-MA  
306 infection. Each dot represents the mean of individual CC-RIX strains.

307

308 **Figure 2. Phenotypic distributions, genomics scans, and allele effects maps for 3 traits**  
309 **across the CC-RIX.**

310 **a.** *HrS13*, SARS-CoV lung titer at 2 dpi, *HrS11*, percentage survival following HKU3-MA infection,  
311 and *HrS12*, weight loss at 4 dpi with HKU3-MA. For all 3 panels, CC-RIX strains are sorted by  
312 ascending 2 dpi SARS-MA lung titers, showing the general lack of correlation between  
313 coronavirus disease responses. **b.** Genome scans showing the LOD traces, as well as  
314 significance thresholds ( $p=0.33$  (orange) and  $p=0.2$  (green)) for the same traits listed above. We  
315 identified *HrS13* (chr16) for SARS-CoV titer, *HrS11* (chr5) and *HrS10* (chr13) for HKU3-MA  
316 mortality, and *HrS12* for HKU3-MA weight loss. **c.** Allele effects at each of these loci showing  
317 causal haplotypes for *HrS13* (where 129S1/SvImJ (pink) and PWK/PhJ (red) alleles cause a  
318 reduced titer, *HrS10* where CAST/EiJ (green) and PWK/PhJ (red) alleles cause increased  
319 mortality, *HrS11* where a 129S1/SvImJ (pink) allele causes increased mortality, and *HrS12* where  
320 a PWK/PhJ (red) allele causes decreased weight loss. **d.** We identified relationships between  
321 *HrS10* and SARS-related weight loss and clinical disease (shown is weight loss at 5 dpi), as well  
322 as *HrS11* and SARS-MA titer (shown here is titer at 2 dpi), 0 = low response haplotype, 1 = 1  
323 copy of the high response/PWK haplotype. Each dot represents data from an individual animal.

324

325 **Figure 3. Disease phenotypes in parental strains CC011 and CC074 and identification of a**  
326 **quantitative multitrait locus on chromosome 9 in the CC011xCC074-F2.**

327 **a.** CC011 and CC074 were identified as parental CC strains for a F2-screen based on their  
328 contrasting SARS-MA induced phenotypes. Shown are weight loss, lung viral titer, percentage  
329 survival, and lung hemorrhaging following SARS-MA infection ( $n=6$  for CC011 and CC074,  
330 respectively) and SARS-CoV-2 MA10 ( $n=13$  for CC011 and  $n=13$  for CC074). **b.** Shown as  
331 example is the phenotypic distribution for lung hemorrhage following SARS-MA infection in the  
332 CC011xCC074-F2 panel. The genomic scan shows the LOD traces and significance thresholds  
333 ( $p=0.95$  (black),  $p=0.90$  (blue), and  $p=0.50$  (green)). The allele effect of the lung hemorrhage  
334 phenotype is broken out based on the homozygous CC011 genotype, the homozygous CC074  
335 genotype, or the heterozygous genotype ( $n=234$  individual CC011xCC074-F2 mice). **c.** A  
336 quantitative multitrait locus with major effect was identified on chr9 (74.9–124 Mb), which affected  
337 mortality, weight loss, hemorrhage, lung function, and peripheral hematology. CC011/Unc has a  
338 C57BL/6/PWK haplotype and CC074/Unc has an A/J haplotype in this QTL region.

339

340 **Figure 4. Identification of *CCR9* as a major susceptibility allele during SARS-CoV-2**  
341 **infection.** Infection of *CCR9*<sup>-/-</sup> mice with SARS-CoV-2 MA10 showed significant differences in  
342 weight loss (a.), viral burden in the lung (b.), lung function (c.), and cytokine/chemokine  
343 distribution (d.) in the as well as in the compositions of lung infiltrating immune cells (e.) (n=19  
344 *CCR9*<sup>-/-</sup> and n=19 C57BL/6NJ; with n=4 for 2 dpi, n=7 for 4 dpi, n=5 for 6 dpi, and n=3 for 14 dpi  
345 for weight loss, viral burden, congestion score, multiplex immune-assay and lung pathology;  
346 n=8 for lung function testing; n=12 *CCR9*<sup>-/-</sup> and n=13 C57BL/6NJ with n=2 each for mock, n=5-6  
347 for 4 dpi, and n=5 for 6 dpi for analysis of infiltrating cells). Data were analyzed using two-way-  
348 ANOVA (weight loss, lung function) and Mann-Whitney test (titer, congestion score, pathology  
349 scores, FACS analysis, and cytokine/chemokine analysis; \*p<0.05, \*\*p<0.01.

350  
351 **Figure 5. Identification of major effect locus on chromosome 4 and of *Trim14* as a**  
352 **susceptibility gene during SARS-MA and SARS-CoV-2 MA10 infection.** a. Phenotypic  
353 distribution and genomic scan for *Hrs23* (4dpi weight loss in CC003xCC053-F2, b. *Hrs23* (4dpi  
354 lung hemorrhage in CC03xCC053-F2), and c. *Hrs24* (overall mortality in CC011xCC074-F2. d.  
355 Infection of *Trim14*<sup>Δ47/Δ47</sup> mice with SARS-MA showed significantly more weight loss and an  
356 increase in viral load in the lung compared to C57BL/6J mice over the course of a 7-day infection.  
357 A similar trend of infection progression was observed in *Trim14*<sup>Δ47/Δ47</sup> mice infected with SARS-  
358 CoV-2 MA10; n=10 *Trim14*<sup>Δ47/Δ47</sup> and n=10 C57BL/6J for weight loss and viral load studies with  
359 SARS-CoV-2 MA10 studies; data was analyzed via student t test, \*p<0.05, \*\*p<0.01, \*\*\*p<0.005).

360  
361 **Figure 6. Susceptibility map for SARS-MA and HKU3-MA.** Depicted are significant (p=0.95  
362 and p=0.90) QTLs in the Pre-CC (striped), CC-RIX (solid), and the CC011xCC074-F2 and  
363 CC003cxCC053-F2 screens, respectively (both checkered).

364  
365 **Table1. List of significant QTLs**

366  
367 **Supplemental Figure Legends**

368 **Figure S1. CC074 show elevated viral titer at 2 dpi.** Lung tissue of SARS-CoV-2 MA10 infected  
369 CC011 (n=6 for d2pi and n=13 for d4pi) and CC074 (n=6 for d2pi and n=13 for d4pi) was tittered  
370 by plaque assay to detect viral load on d2pi and d4pi.

371  
372 **Figure S2 Design of CC011xCC074-F2 cross.** In specific cases, individual CC strains may  
373 present extreme outlier phenotypes, suggesting a sorting of multiple susceptibility alleles in this

374 strain. In such cases, a mapping intercross (e.g. an F2) between two extreme strains can reveal  
375 a large number of causal loci and interaction networks.

376

377 **Figure S3. Phenotypic distribution of disease phenotypes after SARS-MA infection in the**  
378 **CC011xCC074-F2 screen.** **a.** Lung hemorrhaging, **b.** weight loss at 4 dpi, **c.** lung titer at 4 dpi,  
379 **d.** percentage survival, **e.** peripheral blood lymphocytes, **f.** peripheral blood neutrophils, and **g.**  
380 PenH lung function. Each dot represents a single animal.

381

382 **Figure S4. *CCR9*<sup>-/-</sup> mice show significant mortality and lung pathology starting by d6pi of**  
383 **infection.** Infection of *CCR9*<sup>-/-</sup> mice with SARS-CoV-2 MA10 showed significant differences in  
384 mortality (**a.**), congestion score (**b.**), lung pathology (**c.** and **d.**). Representative H&E stains of lung  
385 tissue sections are shown for 4, 6, and 14 dpi for *CCR9*<sup>-/-</sup> and C57BL/6NJ, scale bar indicates  
386 100µm (**e.**), (n=19 *CCR9*<sup>-/-</sup> and n=19 C57BL/6NJ; with n=4 for 2 dpi, n=7 for 4 dpi, n=5 for 6 dpi,  
387 and n=3 for 14 dpi congestion score and histopathology scoring. Data were analyzed using log-  
388 rank (mortality) and Mann-Whitney test (congestion score and pathology scores), \*p<0.05.

389

390 **Figure S5. Infiltrating cells in BAL of *CCR9*<sup>-/-</sup> and C57BL/6NJ mice after SARS-CoV-2**  
391 **MA10 infection.** Infection of *CCR9*<sup>-/-</sup> mice with SARS-CoV-2 MA10 showed significant  
392 differences in the compositions of lung infiltrating immune cells in BAL (**a.**) as well as in  
393 cytokine/chemokine distribution in serum (**b.**) (n=19 *CCR9*<sup>-/-</sup> and n=19 C57BL/6NJ; with n=4 for  
394 2 dpi, n=7 for 4 dpi, n=5 for 6 dpi, and n=3 for 14 dpi for multiplex immune-assay and n=12  
395 *CCR9*<sup>-/-</sup> and n=13 C57BL/6NJ with n=2 each for mock, n=5-6 for 4 dpi, and n=5 for 6 dpi for  
396 analysis of infiltrating cells). Data were analyzed using Mann-Whitney test, \*p<0.05, \*\*p<0.01.

397

398 **Figure S6. Lung tissue from *Trim14*<sup>Δ47/Δ47</sup> mice lacked detectable *Trim14* mRNA.** Tissue from  
399 *Trim14*<sup>Δ47/Δ47</sup> were found to lack detectable *Trim14* mRNA, likely due to nonsense-mediated  
400 decay, as measured by RT-qPCR in comparison to littermates.

401

402 **Figure S7. Gating schemes for flow cytometry analysis.**

403

404 **Supplemental Table S1. List of suggestive QTLs.**

405

406 **Acknowledgments**

407 This study was supported by grants in aid from the National Institutes of Health, Allergy and  
408 Infectious Diseases (AI100625 and AI149644 to R.S.B., M.T.H., M.T.F., and F.P.M.V.),  
409 (R00AG049092 to V.D.M.), a contract from the NIH (HHSN272201700036I; Task Order #38  
410 75N93020F00001 to R.S.B), and support from NCATS (UL1TR002369 to M.A.M. and S.K.M.).  
411 We would like to thank the Systems Genetics Core Facility (UNC) for maintaining and distributing  
412 Collaborative Cross mice. The research was also supported by a generous gift from the Chan-  
413 Zuckerberg foundation.

414

#### 415 **Author contributions**

416 A.S., L.E.G., F.P.M.V., S.K.M., M.T.H., V.D.M., M.T.F., R.S.B designed screens and biology  
417 experiments; A.S., L.E.G., S.R.L., V.D.M. conducted and characterized infections *in vivo*; A.S.,  
418 L.E.G., S.R.L., E.S.W., K.L.J., D.T.S. performed *in vitro* studies and immune cell quantifications;  
419 A.S., L.E.G, S.R.L., R.L.G., S.A.M., V.D.M., M.T.F. processed and analyzed data, and generated  
420 figures; A.S., B.K.H, M.A.M., S.J., S.C., S.K.M., M.T.F. performed genetic mapping studies;  
421 L.A.V., L.B.T., M.S.D. designed and isolated *Trim14*-deficient mice; A.S., L.E.G., V.D.M.  
422 performed *in vivo* evaluation of *Trim14*-deficient infected animals; S.A.M. scored pathologic  
423 changes in the lungs of infected mice; R.L.G., S.A. isolated recombinant viruses; T.A.B., P.H.,  
424 G.D.S., D.R.M. produced CC-RIX and F2 animals, and processed samples for genotyping; L.E.G.,  
425 S.R.L., B.K.H, M.A.M., K.L.J., S.J., T.A.B., L.B.T., D.R.M., G.D.S., M.S.D., F.P.M.V., S.K.M.,  
426 M.T.H. edited the manuscript; A.S., M.T.F., R.S.B. wrote the manuscript.

427

#### 428 **Competing interests**

429 The authors have no competing interests.

430

#### 431 **References**

- 432 1 Ge, D. *et al.* Genetic variation in IL28B predicts hepatitis C treatment-induced viral  
433 clearance. *Nature* **461**, 399-401, doi:10.1038/nature08309 (2009).
- 434 2 McLaren, P. J. *et al.* Polymorphisms of large effect explain the majority of the host  
435 genetic contribution to variation of HIV-1 virus load. *Proc Natl Acad Sci U S A* **112**,  
436 14658-14663, doi:10.1073/pnas.1514867112 (2015).
- 437 3 Wang, Q., Vlasova, A. N., Kenney, S. P. & Saif, L. J. Emerging and re-emerging  
438 coronaviruses in pigs. *Curr Opin Virol* **34**, 39-49, doi:10.1016/j.coviro.2018.12.001  
439 (2019).
- 440 4 Chen, B. *et al.* Overview of lethal human coronaviruses. *Signal Transduct Target Ther* **5**,  
441 89, doi:10.1038/s41392-020-0190-2 (2020).
- 442 5 Zhou, P. *et al.* A pneumonia outbreak associated with a new coronavirus of probable bat  
443 origin. *Nature* **579**, 270-273, doi:10.1038/s41586-020-2012-7 (2020).

- 444 6 Zhang, Y. Z. & Holmes, E. C. A Genomic Perspective on the Origin and Emergence of  
445 SARS-CoV-2. *Cell* **181**, 223-227, doi:10.1016/j.cell.2020.03.035 (2020).
- 446 7 Menachery, V. D. *et al.* SARS-like WIV1-CoV poised for human emergence. *Proc Natl*  
447 *Acad Sci U S A* **113**, 3048-3053, doi:10.1073/pnas.1517719113 (2016).
- 448 8 Menachery, V. D. *et al.* A SARS-like cluster of circulating bat coronaviruses shows  
449 potential for human emergence. *Nat Med* **21**, 1508-1513, doi:10.1038/nm.3985 (2015).
- 450 9 Anthony, S. J. *et al.* Further Evidence for Bats as the Evolutionary Source of Middle East  
451 Respiratory Syndrome Coronavirus. *mBio* **8**, doi:10.1128/mBio.00373-17 (2017).
- 452 10 Coronaviridae Study Group of the International Committee on Taxonomy of, V. The  
453 species Severe acute respiratory syndrome-related coronavirus: classifying 2019-nCoV  
454 and naming it SARS-CoV-2. *Nat Microbiol* **5**, 536-544, doi:10.1038/s41564-020-0695-z  
455 (2020).
- 456 11 Becker, M. M. *et al.* Synthetic recombinant bat SARS-like coronavirus is infectious in  
457 cultured cells and in mice. *Proc Natl Acad Sci U S A* **105**, 19944-19949,  
458 doi:10.1073/pnas.0808116105 (2008).
- 459 12 Ahmad, T., Haroon, Baig, M. & Hui, J. Coronavirus Disease 2019 (COVID-19)  
460 Pandemic and Economic Impact. *Pak J Med Sci* **36**, S73-S78,  
461 doi:10.12669/pjms.36.COVID19-S4.2638 (2020).
- 462 13 Enserink, M. & Kupferschmidt, K. With COVID-19, modeling takes on life and death  
463 importance. *Science* **367**, 1414-1415, doi:10.1126/science.367.6485.1414-b (2020).
- 464 14 Rasmussen, A. L. *et al.* Host genetic diversity enables Ebola hemorrhagic fever  
465 pathogenesis and resistance. *Science* **346**, 987-991, doi:10.1126/science.1259595 (2014).
- 466 15 Sanchez, A., Wagoner, K. E. & Rollin, P. E. Sequence-based human leukocyte antigen-B  
467 typing of patients infected with Ebola virus in Uganda in 2000: identification of alleles  
468 associated with fatal and nonfatal disease outcomes. *J Infect Dis* **196 Suppl 2**, S329-S336,  
469 doi:10.1086/520588 (2007).
- 470 16 Cameron, M. J. *et al.* Interferon-mediated immunopathological events are associated with  
471 atypical innate and adaptive immune responses in patients with severe acute respiratory  
472 syndrome. *J Virol* **81**, 8692-8706, doi:10.1128/JVI.00527-07 (2007).
- 473 17 Shang, J. *et al.* Structure of mouse coronavirus spike protein complexed with receptor  
474 reveals mechanism for viral entry. *PLoS Pathog* **16**, e1008392,  
475 doi:10.1371/journal.ppat.1008392 (2020).
- 476 18 Roberts, A. *et al.* A mouse-adapted SARS-coronavirus causes disease and mortality in  
477 BALB/c mice. *PLoS Pathog* **3**, e5, doi:10.1371/journal.ppat.0030005 (2007).
- 478 19 Dinno, K. H. *et al.* A mouse-adapted SARS-CoV-2 model for the evaluation of COVID-  
479 19 medical countermeasures. *bioRxiv*, doi:10.1101/2020.05.06.081497 (2020).
- 480 20 Leist, S. R. *et al.* A Mouse-adapted SARS-CoV-2 induces Acute Lung Injury (ALI) and  
481 mortality in Standard Laboratory Mice. *Cell*, doi:10.1016/j.cell.2020.09.050 (2020).
- 482 21 Leist, S. R. & Baric, R. S. Giving the Genes a Shuffle: Using Natural Variation to  
483 Understand Host Genetic Contributions to Viral Infections. *Trends Genet* **34**, 777-789,  
484 doi:10.1016/j.tig.2018.07.005 (2018).
- 485 22 Schafer, A., Baric, R. S. & Ferris, M. T. Systems approaches to Coronavirus  
486 pathogenesis. *Curr Opin Virol* **6**, 61-69, doi:10.1016/j.coviro.2014.04.007 (2014).
- 487 23 Noll, K. E., Ferris, M. T. & Heise, M. T. The Collaborative Cross: A Systems Genetics  
488 Resource for Studying Host-Pathogen Interactions. *Cell Host Microbe* **25**, 484-498,  
489 doi:10.1016/j.chom.2019.03.009 (2019).

- 490 24 Srivastava, A. *et al.* Genomes of the Mouse Collaborative Cross. *Genetics* **206**, 537-556,  
491 doi:10.1534/genetics.116.198838 (2017).
- 492 25 Collaborative Cross, C. The genome architecture of the Collaborative Cross mouse  
493 genetic reference population. *Genetics* **190**, 389-401, doi:10.1534/genetics.111.132639  
494 (2012).
- 495 26 Gralinski, L. E. *et al.* Genome Wide Identification of SARS-CoV Susceptibility Loci  
496 Using the Collaborative Cross. *PLoS Genet* **11**, e1005504,  
497 doi:10.1371/journal.pgen.1005504 (2015).
- 498 27 Frieman, M. *et al.* Molecular determinants of severe acute respiratory syndrome  
499 coronavirus pathogenesis and virulence in young and aged mouse models of human  
500 disease. *J Virol* **86**, 884-897, doi:10.1128/JVI.05957-11 (2012).
- 501 28 Maurizio, P. L. *et al.* Bayesian Diallel Analysis Reveals Mx1-Dependent and Mx1-  
502 Independent Effects on Response to Influenza A Virus in Mice. *G3 (Bethesda)* **8**, 427-  
503 445, doi:10.1534/g3.117.300438 (2018).
- 504 29 Noll, K. E. *et al.* Complex Genetic Architecture Underlies Regulation of Influenza-A-  
505 Virus-Specific Antibody Responses in the Collaborative Cross. *Cell Rep* **31**, 107587,  
506 doi:10.1016/j.celrep.2020.107587 (2020).
- 507 30 Aylor, D. L. *et al.* Genetic analysis of complex traits in the emerging Collaborative  
508 Cross. *Genome Res* **21**, 1213-1222, doi:10.1101/gr.111310.110 (2011).
- 509 31 Ferris, M. T. *et al.* Modeling host genetic regulation of influenza pathogenesis in the  
510 collaborative cross. *PLoS Pathog* **9**, e1003196, doi:10.1371/journal.ppat.1003196 (2013).
- 511 32 Abiola, O. *et al.* The nature and identification of quantitative trait loci: a community's  
512 view. *Nat Rev Genet* **4**, 911-916, doi:10.1038/nrg1206 (2003).
- 513 33 Ellinghaus, D. *et al.* Genomewide Association Study of Severe Covid-19 with  
514 Respiratory Failure. *N Engl J Med*, doi:10.1056/NEJMoa2020283 (2020).
- 515 34 Pairo-Castineira, E. *et al.* Genetic mechanisms of critical illness in Covid-19. *Nature*,  
516 doi:10.1038/s41586-020-03065-y (2020).
- 517 35 Shelton, J. F. *et al.* Trans-ancestry analysis reveals genetic and nongenetic associations  
518 with COVID-19 susceptibility and severity. *Nat Genet*, doi:10.1038/s41588-021-00854-7  
519 (2021).
- 520 36 Pathak, M. & Lal, G. The Regulatory Function of CCR9(+) Dendritic Cells in  
521 Inflammation and Autoimmunity. *Front Immunol* **11**, 536326,  
522 doi:10.3389/fimmu.2020.536326 (2020).
- 523 37 Wang, C. *et al.* The role of chemokine receptor 9/chemokine ligand 25 signaling: From  
524 immune cells to cancer cells. *Oncol Lett* **16**, 2071-2077, doi:10.3892/ol.2018.8896  
525 (2018).
- 526 38 Lopez-Pacheco, C., Soldevila, G., Du Pont, G., Hernandez-Pando, R. & Garcia-Zepeda,  
527 E. A. CCR9 Is a Key Regulator of Early Phases of Allergic Airway Inflammation.  
528 *Mediators Inflamm* **2016**, 3635809, doi:10.1155/2016/3635809 (2016).
- 529 39 Nakamoto, N. Role of inflammatory macrophages and CCR9/CCL25 chemokine axis in  
530 the pathogenesis of liver injury as a therapeutic target. *Nihon Rinsho Meneki Gakkai*  
531 *Kaishi* **39**, 460-467, doi:10.2177/jsci.39.460 (2016).
- 532 40 Chu, P. S. *et al.* C-C motif chemokine receptor 9 positive macrophages activate hepatic  
533 stellate cells and promote liver fibrosis in mice. *Hepatology* **58**, 337-350,  
534 doi:10.1002/hep.26351 (2013).

- 535 41 Channappanavar, R. *et al.* Dysregulated Type I Interferon and Inflammatory Monocyte-  
536 Macrophage Responses Cause Lethal Pneumonia in SARS-CoV-Infected Mice. *Cell Host*  
537 *Microbe* **19**, 181-193, doi:10.1016/j.chom.2016.01.007 (2016).
- 538 42 Murdoch, B. M. *et al.* Genome-wide scan identifies loci associated with classical BSE  
539 occurrence. *PLoS One* **6**, e26819, doi:10.1371/journal.pone.0026819 (2011).
- 540 43 Prisco, S. Z. *et al.* Refined mapping of a hypertension susceptibility locus on rat  
541 chromosome 12. *Hypertension* **64**, 883-890,  
542 doi:10.1161/HYPERTENSIONAHA.114.03550 (2014).
- 543 44 Jamieson, S. E. *et al.* Evidence for a cluster of genes on chromosome 17q11-q21  
544 controlling susceptibility to tuberculosis and leprosy in Brazilians. *Genes Immun* **5**, 46-  
545 57, doi:10.1038/sj.gene.6364029 (2004).
- 546 45 Gralinski, L. E. *et al.* Allelic Variation in the Toll-Like Receptor Adaptor Protein Ticam2  
547 Contributes to SARS-Coronavirus Pathogenesis in Mice. *G3 (Bethesda)* **7**, 1653-1663,  
548 doi:10.1534/g3.117.041434 (2017).
- 549 46 Zhou, Z. *et al.* TRIM14 is a mitochondrial adaptor that facilitates retinoic acid-inducible  
550 gene-I-like receptor-mediated innate immune response. *Proc Natl Acad Sci U S A* **111**,  
551 E245-254, doi:10.1073/pnas.1316941111 (2014).
- 552 47 Tan, P. *et al.* Assembly of the WHIP-TRIM14-PPP6C Mitochondrial Complex Promotes  
553 RIG-I-Mediated Antiviral Signaling. *Mol Cell* **68**, 293-307 e295,  
554 doi:10.1016/j.molcel.2017.09.035 (2017).
- 555 48 Lindesmith, L. *et al.* Human susceptibility and resistance to Norwalk virus infection. *Nat*  
556 *Med* **9**, 548-553, doi:10.1038/nm860 (2003).
- 557 49 Menachery, V. D., Gralinski, L. E., Baric, R. S. & Ferris, M. T. New Metrics for  
558 Evaluating Viral Respiratory Pathogenesis. *PLoS One* **10**, e0131451,  
559 doi:10.1371/journal.pone.0131451 (2015).
- 560 50 Leist, S. R., Jensen, K. L., Baric, R. S. & Sheahan, T. P. Increasing the translation of  
561 mouse models of MERS coronavirus pathogenesis through kinetic hematological  
562 analysis. *PLoS One* **14**, e0220126, doi:10.1371/journal.pone.0220126 (2019).
- 563 51 Sheahan, T. P. *et al.* Comparative therapeutic efficacy of remdesivir and combination  
564 lopinavir, ritonavir, and interferon beta against MERS-CoV. *Nat Commun* **11**, 222,  
565 doi:10.1038/s41467-019-13940-6 (2020).
- 566 52 Sigmon, J. S. *et al.* Content and performance of the MiniMUGA genotyping array, a new  
567 tool to improve rigor and reproducibility in mouse research. *bioRxiv*,  
568 2020.2003.2012.989400, doi:10.1101/2020.03.12.989400 (2020).
- 569 53 Gatti, D. M. *et al.* Quantitative trait locus mapping methods for diversity outbred mice.  
570 *G3 (Bethesda)* **4**, 1623-1633, doi:10.1534/g3.114.013748 (2014).
- 571 54 Broman, K. W., Wu, H., Sen, S. & Churchill, G. A. R/qlt: QTL mapping in experimental  
572 crosses. *Bioinformatics* **19**, 889-890, doi:10.1093/bioinformatics/btg112 (2003).
- 573

## 574 **Online Material and Methods**

### 575 **Cells and viruses**

576 Recombinant mouse-adapted SARS-CoV MA15 (SARS-MA), HKU3-SRBD-MA (HKU3-MA), and  
577 SARS-CoV-2 MA10 (SARS-2-MA) virus were generated as described previously (HKU3-SRBD-  
578 MA: GenBank Accession Number XXX, SARS-CoV-2 MA10: GenBank Accession Number



579 XXX)<sup>11,18,20</sup>. For virus titration, the caudal lobe of the right lung was homogenized in PBS, resulting  
580 homogenate was serial-diluted and inoculated onto confluent monolayers of Vero E6 cells (ATCC  
581 XXX), followed by agarose overlay. Plaques were visualized with overlay of Neutral Red dye on  
582 day 2 (SARS-MA) or day 3 (SARS-CoV-2 MA10) post infection.

583

#### 584 **Mouse studies and *in vivo* infections**

585 All mouse studies were performed at the University of North Carolina (Animal Welfare Assurance  
586 #A3410-01) using protocols approved by the UNC Institutional Animal Care and Use Committee  
587 (IACUC). Animal studies at Washington University were carried out in accordance with the  
588 recommendations in the Guide for the Care and Use of Laboratory Animals of the National  
589 Institutes of Health. The protocols were approved by the IACUC at the Washington University  
590 School of Medicine (Assurance number A3381-01).

591 Mouse studies fall into three major classes: CC-RIX, F2 intercross mice, and inbred wild-type or  
592 gene-edited mice. The laboratory of Pardo Manuel de Villena (FPMV) purchased CC mice from  
593 the Systems Genetics Core Facility at UNC between 2012 and 2018. These CC mice were used  
594 to breed CC-RIXs in the FPMV laboratory, to ensure proper cohorts and batch sizes. CC-RIXs  
595 were generated in a ring design such that each CC-RIX had one copy of the MHC H2B<sup>b</sup> allele,  
596 and that each CC strain was used as both dam and sire in equal proportion across all RIXs. Mice  
597 (~105 CC-RIX strains, 3 animals each) were transferred at 5-6 weeks of age to the Baric (RSB)  
598 laboratory for infection between 9-12 weeks of age.  
599 The details of the CC003 x CC053 F2 are published<sup>45</sup>. The Systems Genetics Core Facility was  
600 contracted to generate the F2 cross between CC011 and CC074. F1 mice between CC011 and  
601 CC074 were generated in both potential cross directions, and F2 mice were bred in all 4 possible  
602 F1 x F1 combinations, to ensure appropriately balanced sex chromosome and parent-of-origin  
603 effects. F2 mice (226 males, 177 females) were weaned such that littermates were randomized  
604 to different experimental cages to further reduce litter- or batch-effects on the study, and mice  
605 were transferred at 5-6 weeks of age to the RSB laboratory for infection between 9-12 weeks of  
606 age.

607 15- week old *CCR9*<sup>-/-</sup> mice (strain 027041) and 15-week old female C57BL/6NJ mice (strain  
608 005304) were purchased from Jackson Laboratory. CC-RIX, CC-F2 mice, *Trim14*-deficient, and  
609 *CCR9*<sup>-/-</sup> mice were infected with 5x10<sup>3</sup> (CC-RIX with SARS-MA), 1x10<sup>4</sup> (CC-F2 with SARS-MA  
610 and SARS-CoV-2 MA10), and 1x10<sup>5</sup> (CC-RIX with HKU3-MA, *Trim14*<sup>Δ47/Δ47</sup> and *CCR9*<sup>-/-</sup> mice with  
611 SARS-MA and SARS-CoV-2 MA10) plaque forming units (PFU) in 50 μl PBS intranasally at 9-12  
612 (CC-RIX and CC-F2 mice) or 15 (*CCR9*<sup>-/-</sup> and C57BL/6NJ) weeks of age, respectively. Body

613 weight, mortality, and pulmonary function by whole body plethysmography<sup>49</sup> were monitored daily  
614 where indicated. At indicated timepoints, mice were euthanized and gross pathology (hemorrhage  
615 score) of the lung was assessed and scored on a scale from 0 (no hemorrhage) to 4 (severe  
616 hemorrhage affecting all lung lobes). Then lung tissue was harvested for titer and histopathology  
617 analysis; and blood samples were harvested to determine antibody composition and for analysis  
618 of peripheral immune cells. Samples were stored at -80°C until homogenized and titered by  
619 plaque assay as described above. Serum was prepared and SARS-CoV spike-specific antibody  
620 were quantified by ELISA as previously described<sup>33</sup>. Peripheral blood was diluted 1:5 in  
621 PBS/EDTA and analyzed with the VetScan HM5 as previously described<sup>50</sup>. Histopathology  
622 samples were fixed in 10% phosphate buffered formalin for 7 days before paraffin embedding,  
623 sectioning stained with hematoxylin and eosin.

624

### 625 **Generation of *Trim14*-deficient mice**

626 Gene-edited *Trim14*-deficient mice were generated with support from the Genome Engineering  
627 and iPSC center and Department of Pathology Micro-Injection Core (Washington University  
628 School of Medicine). A sgRNA targeting exon 4 of *Trim14* was selected based on minimal off-  
629 target effects *in silico* and targeting efficiency *in vitro*. The sgRNA (5'-  
630 ACCAATGGACTCGCCTGANGG-3') was synthesized, transcribed (HiScribe T7 *In vitro*  
631 Transcription Kit, New England BioLabs), and purified (MEGAclean Transcription Clean-Up Kit,  
632 Thermo Fisher). The sgRNA was mixed and co-injected with Cas9 RNA at 5ng/μl and 10ng/μl  
633 final concentrations into half-day-old C57BL/6J embryos (E0.5). After next-generation sequencing  
634 of founders and two generations of mice backcrossed to C57BL/6J mice, a mouse line with a 47-  
635 nucleotide deletion (5'-  
636 GCCTGAAGGAAAGTGAGTTGCCTAAGACCAACTCCAAGTCCTTGCTC-3') encompassing the  
637 3' splice site of intron 4 and part of the coding region of exon 4 was generated. These *Trim14*<sup>Δ47/Δ47</sup>  
638 mice were bred as homozygotes and used for experiments. *Trim14*<sup>Δ47/Δ47</sup> mice were born in normal  
639 Mendelian frequencies and showed no apparent defects in development, growth, or fecundity.  
640 Lung tissue from *Trim14*<sup>Δ47/Δ47</sup> were found to lack detectable *Trim14* mRNA, likely due to  
641 nonsense-mediated decay, as measured by RT-qPCR using a predesigned primer/probe set for  
642 *Trim14* (IDT, Assay ID Mm.PT.58.286730) and the housekeeping gene *GAPDH* (IDT, Assay ID  
643 Mm.PT.39a.1). Sanger sequencing of a polymerase chain reaction amplicon [5'  
644 GGCACAGCTCAACCCATGG -3' (forward) and 5'- ACCAGCGAGCTCGTGCTCC -3' (reverse)]  
645 was used for genotyping.

646

647 **Flow cytometry analysis of immune cell infiltrates.**

648 For analysis of BAL fluid, mice were sacrificed by ketamine overdose, followed by cannulation of  
649 the trachea with a 19-G canula. BAL was performed with three washes of 0.8 ml of sterile PBS.  
650 BAL fluid was centrifuged, and single cell suspensions were generated for staining. For analysis  
651 of lung tissues, mice were perfused with sterile PBS, and the right inferior lung lobes were  
652 digested at 37°C with 630 µg/mL collagenase D (Roche) and 75 U/mL of DNase I (Sigma–Aldrich)  
653 for 2 h. Single cell suspensions of BAL fluid and lung digest were preincubated with Fc Block  
654 antibody (BD PharMingen) in PBS + 2% heat-inactivated FBS for 10 min at room temperature  
655 before staining. Cells were incubated with antibodies against the following markers: efluor506  
656 Viability Dye (Thermo Fisher, 65-0866-14), BUV395 anti- CD45 (Clone 30-F11, BD Biosciences),  
657 BV711 anti-CD11b (Clone M1/70, Biolegend), APC-Cy7 anti-CD11c (Clone HL3, BD  
658 Biosciences), BV650 anti-Ly6G (Clone 1A8, Biolegend), Pacific Blue anti-Ly6C (Clone HK1.4,  
659 Biolegend) FITC anti-CD24 (Clone M1/69, Biolegend), PE anti-Siglec F (Clone E50-2440,  
660 Biolegend), PE-Cy7 anti-CD64 (Clone X54-5/7.1, Biolegend), AF700 anti-MHCII (Clone  
661 M5/114.15.2, Biolegend), BV421 anti-CD3 (Clone 17A2, Biolegend), BV785 anti-CD4 (Clone  
662 GK1.5, Biolegend), APC anti-CD8a (Clone 53-6.7, Biolegend) BV421 anti-B220 (Clone RA3-  
663 6B2, Biolegend) APC-Cy7 anti-CD44 (Clone IM7, Biolegend) BV605 anti-CD62L (Clone MEL-14,  
664 Biolegend). All antibodies were used at a dilution of 1:200. Cells were stained for 20 min at 4°C,  
665 washed, fixed and permeabilized for intracellular staining with Foxp3/Transcription Factor  
666 Staining Buffer Set (eBioscience) according to manufacturer’s instructions. Cells were incubated  
667 overnight at 4°C with BV421 anti-Foxp3 (Clone MF-14, Biolegend) washed, re-fixed with 4% PFA  
668 (EMS) for 20 min and resuspended in permeabilization buffer. Absolute cell counts were  
669 determined using Trucount beads (BD). Flow cytometric data were acquired on a cytometer (BD-  
670 X20; BD Biosciences) and analyzed using FlowJo software (Tree Star) (**Figure S7**).

671

672 **Cytokine and chemokine protein analysis**

673 The small center lung lobe of each mouse was homogenized in 1 ml of PBS and briefly centrifuged  
674 to remove debris. Fifty microliters of homogenate were used to measure cytokine and chemokine  
675 protein abundance using a Bio-Plex Pro mouse cytokine 23-plex assay (Bio-Rad) according to  
676 the manufacturer’s instructions.

677

678 **Lung pathology scoring**

679 Two separate lung pathology scoring scales, Matute-Bello and Diffuse Alveolar Damage (DAD),  
680 were used to quantify acute lung injury (ALI)<sup>51</sup>.

681 For Matute-Bello scoring samples were blinded and three random fields of lung tissue were  
682 chosen and scored for the following: (A) neutrophils in alveolar space (none = 0, 1–5 cells = 1, >  
683 5 cells = 2), (B) neutrophils in interstitial space (none = 0, 1–5 cells = 1, > 5 cells = 2), (C) hyaline  
684 membranes (none = 0, one membrane = 1, > 1 membrane = 2), (D) Proteinaceous debris in air  
685 spaces (none = 0, one instance = 1, > 1 instance = 2), (E) alveolar septal thickening (< 2 $\mu$ m mock  
686 thickness = 0, 2–4 $\mu$ m mock thickness = 1, > 4 $\mu$ m mock thickness = 2). Scores from A–E were put  
687 into the following formula score = [(20x A) + (14 x B) + (7 x C) + (7 x D) + (2 x E)]/100 to obtain a  
688 lung injury score per field and then averaged for the final score for that sample.

689 In a similar way, for DAD scoring, three random fields of lung tissue were scored for the in a  
690 blinded manner for: 1= absence of cellular sloughing and necrosis, 2= uncommon solitary cell  
691 sloughing and necrosis (1–2 foci/field), 3=multifocal (3+foci) cellular sloughing and necrosis with  
692 uncommon septal wall hyalinization, or 4=multifocal (>75% of field) cellular sloughing and  
693 necrosis with common and/or prominent hyaline membranes. To obtain the final DAD score per  
694 mouse, the scores for the three fields per mouse were averaged.

695

## 696 **Genotyping**

697 CC003, CC053, their F1 progeny, and the F2 cross were genotyped as previously described<sup>45</sup>.  
698 CC011, CC074, their F1 progeny, and the F2 cross were genotyped on the MiniMUGA genotyping  
699 array<sup>52</sup>. Genomic DNA was isolated from tail-clips of animals using the Qiagen (Hilden, Germany)  
700 DNeasy Blood & Tissue kit. 1.5  $\mu$ g was sent to Neogen (Lincoln, Nebraska) for processing. We  
701 filtered the genotypes upon return for informativeness within this cross. To be considered  
702 informative, the marker had to have one homozygous allele in all CC011 mice genotyped, the  
703 alternate homozygous allele in all CC074 mice genotyped, and the appropriate call in all F1  
704 animals (H calls on the autosomes, an H call in females on the X chromosomes, and the relevant  
705 homozygous call in male F1s). This filtering reduced the ~10,800 SNPs on the MiniMUGA array  
706 to 2821 informative markers.

707

## 708 **QTL mapping and statistical analyses**

709 For the CC-RIX, we used the same pipeline we previously described<sup>29</sup>. Briefly, each CC-RIX had  
710 their genome represented as an array of probabilities of each of the 8 CC founder haplotypes  
711 (**Figure 1C**). This array was used in the DOQTL R package<sup>53</sup> to run an 8-allele regression at each  
712 of 77,000 markers for our CC-RIX phenotypes. At each marker, a LOD score is calculated  
713 describing the goodness of fit of our trait~genotype model relative to a null model. Significance  
714 was determined by running 1000 permutations scrambling the relationship between phenotypes

715 and haplotypes. In this way, significance is independent of both population allele frequencies, as  
716 well as the phenotypic distribution. For the F2 crosses, instead of a regression on haplotype  
717 probabilities, the R/QTL package conducts a regression of the trait of interest on the exact  
718 genotypes at each locus<sup>54</sup>. As with the CC-RIX mapping, permutation testing is used to identify  
719 significance.  
720

# Figure 1

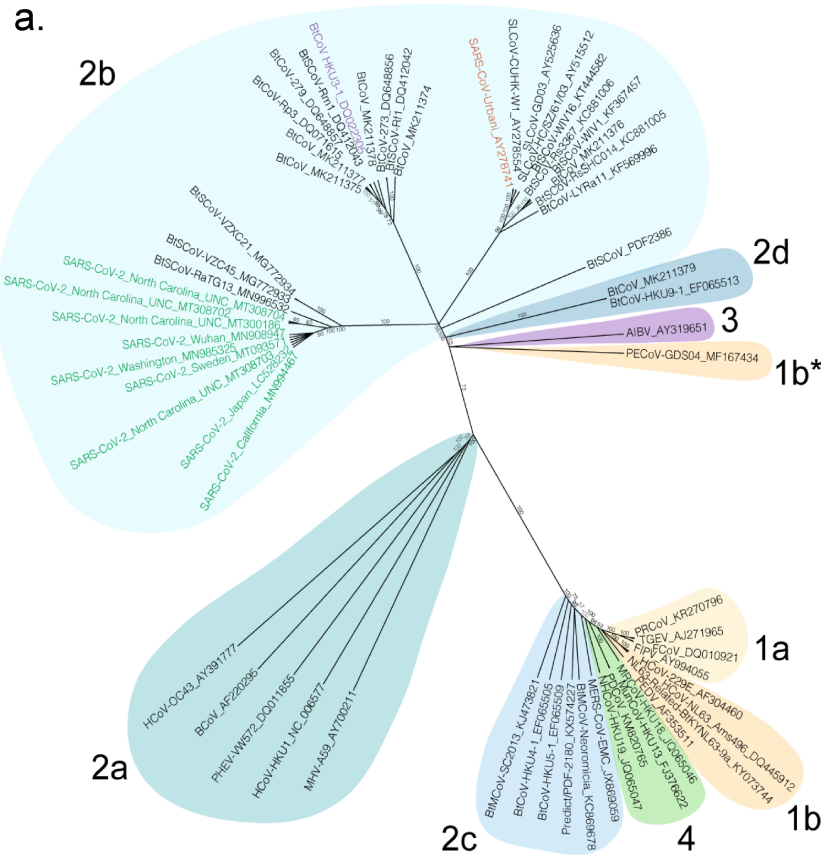

**b.**

| Virus         | 402 | 426 | 436 | 440 | 442 | 472 | 473 | 475 | 479 | 484 | 486 | 487 | 488 | 491 |
|---------------|-----|-----|-----|-----|-----|-----|-----|-----|-----|-----|-----|-----|-----|-----|
| SARS-CoV      | T   | R   | Y   | Y   | Y   | L   | N   | Y   | N   | Y   | T   | T   | G   | Y   |
| SARS-CoV-MA15 | T   | R   | H   | Y   | Y   | L   | N   | Y   | N   | Y   | T   | T   | G   | Y   |
| BiCoV-HKU3    | T   | A   | -   | Y   | S   | -   | -   | -   | S   | N   | N   | V   | P   | Y   |
| SARS-CoV-2    | T   | N   | Y   | Y   | L   | F   | N   | Y   | Q   | Q   | T   | N   | G   | Y   |

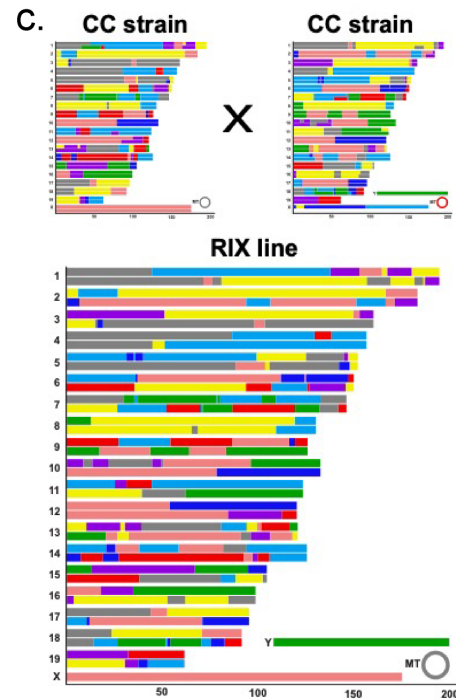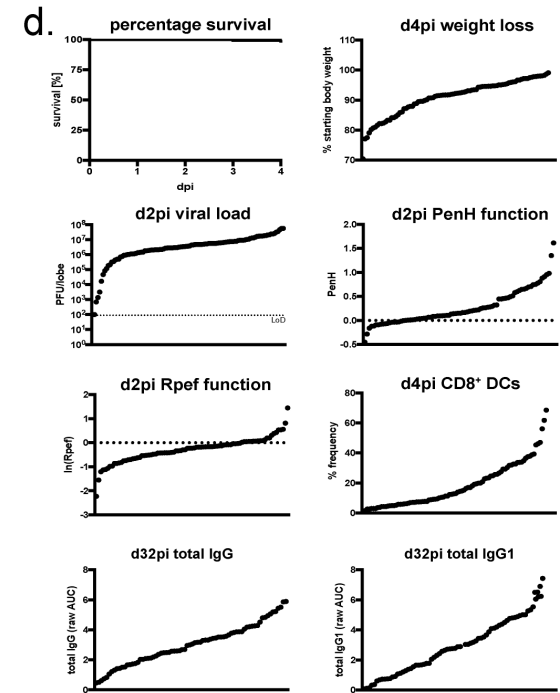

Figure 2

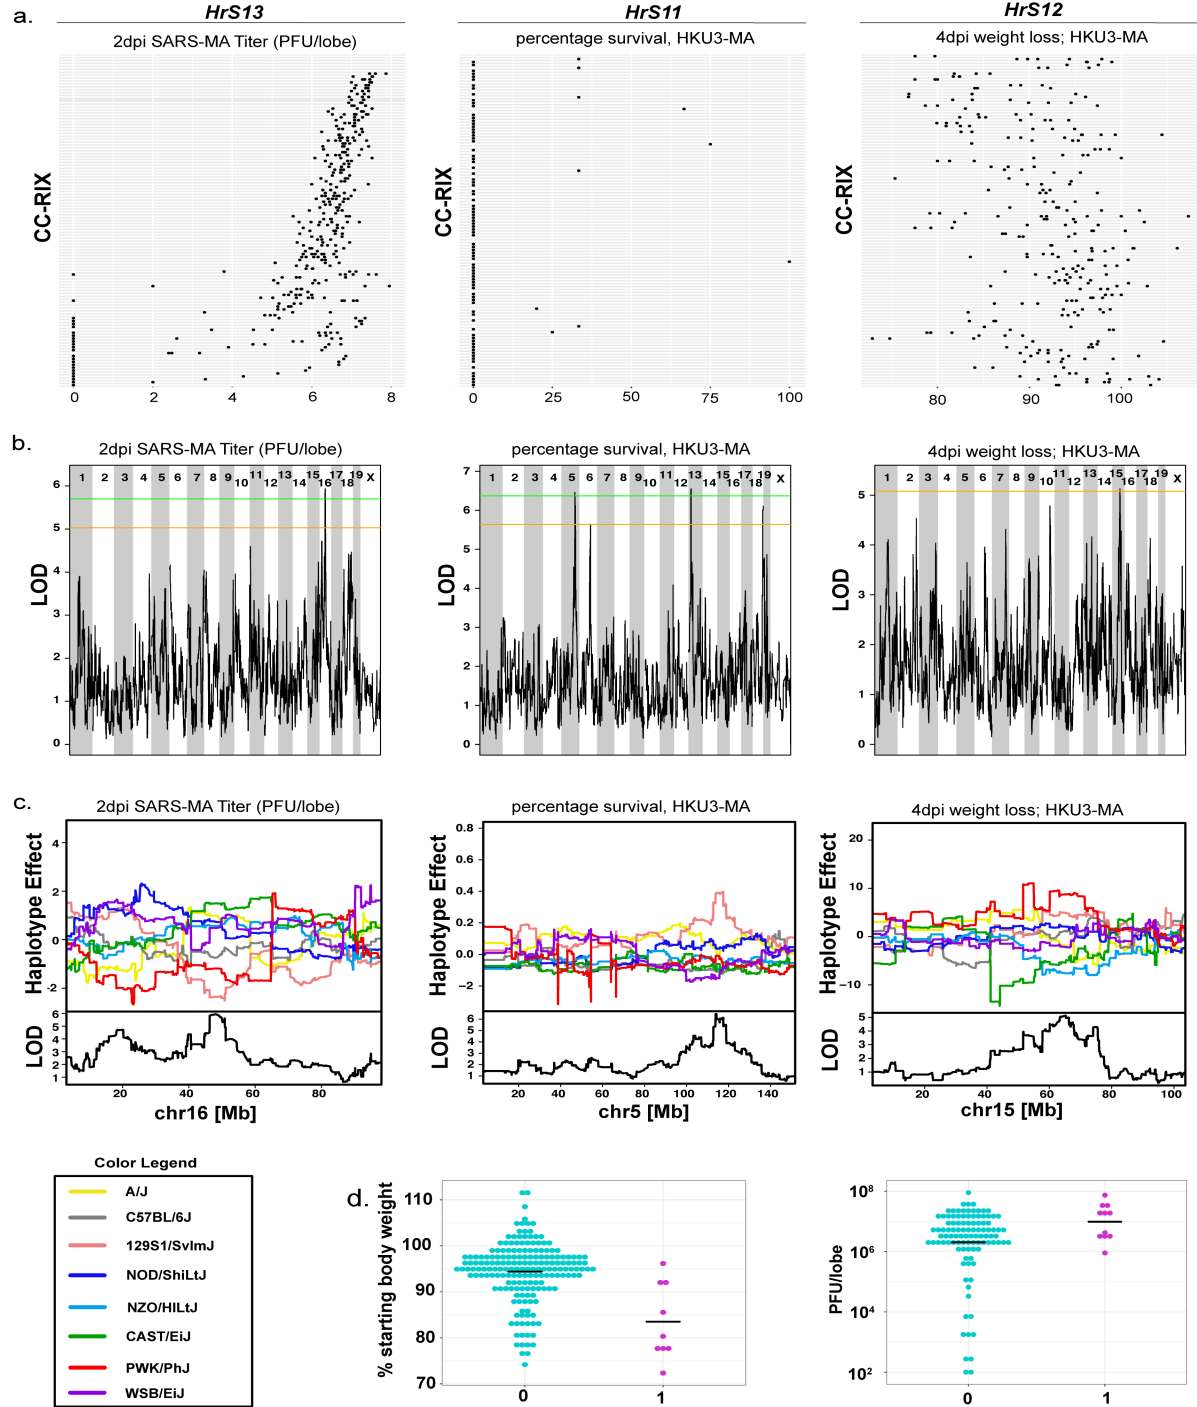

Figure 3

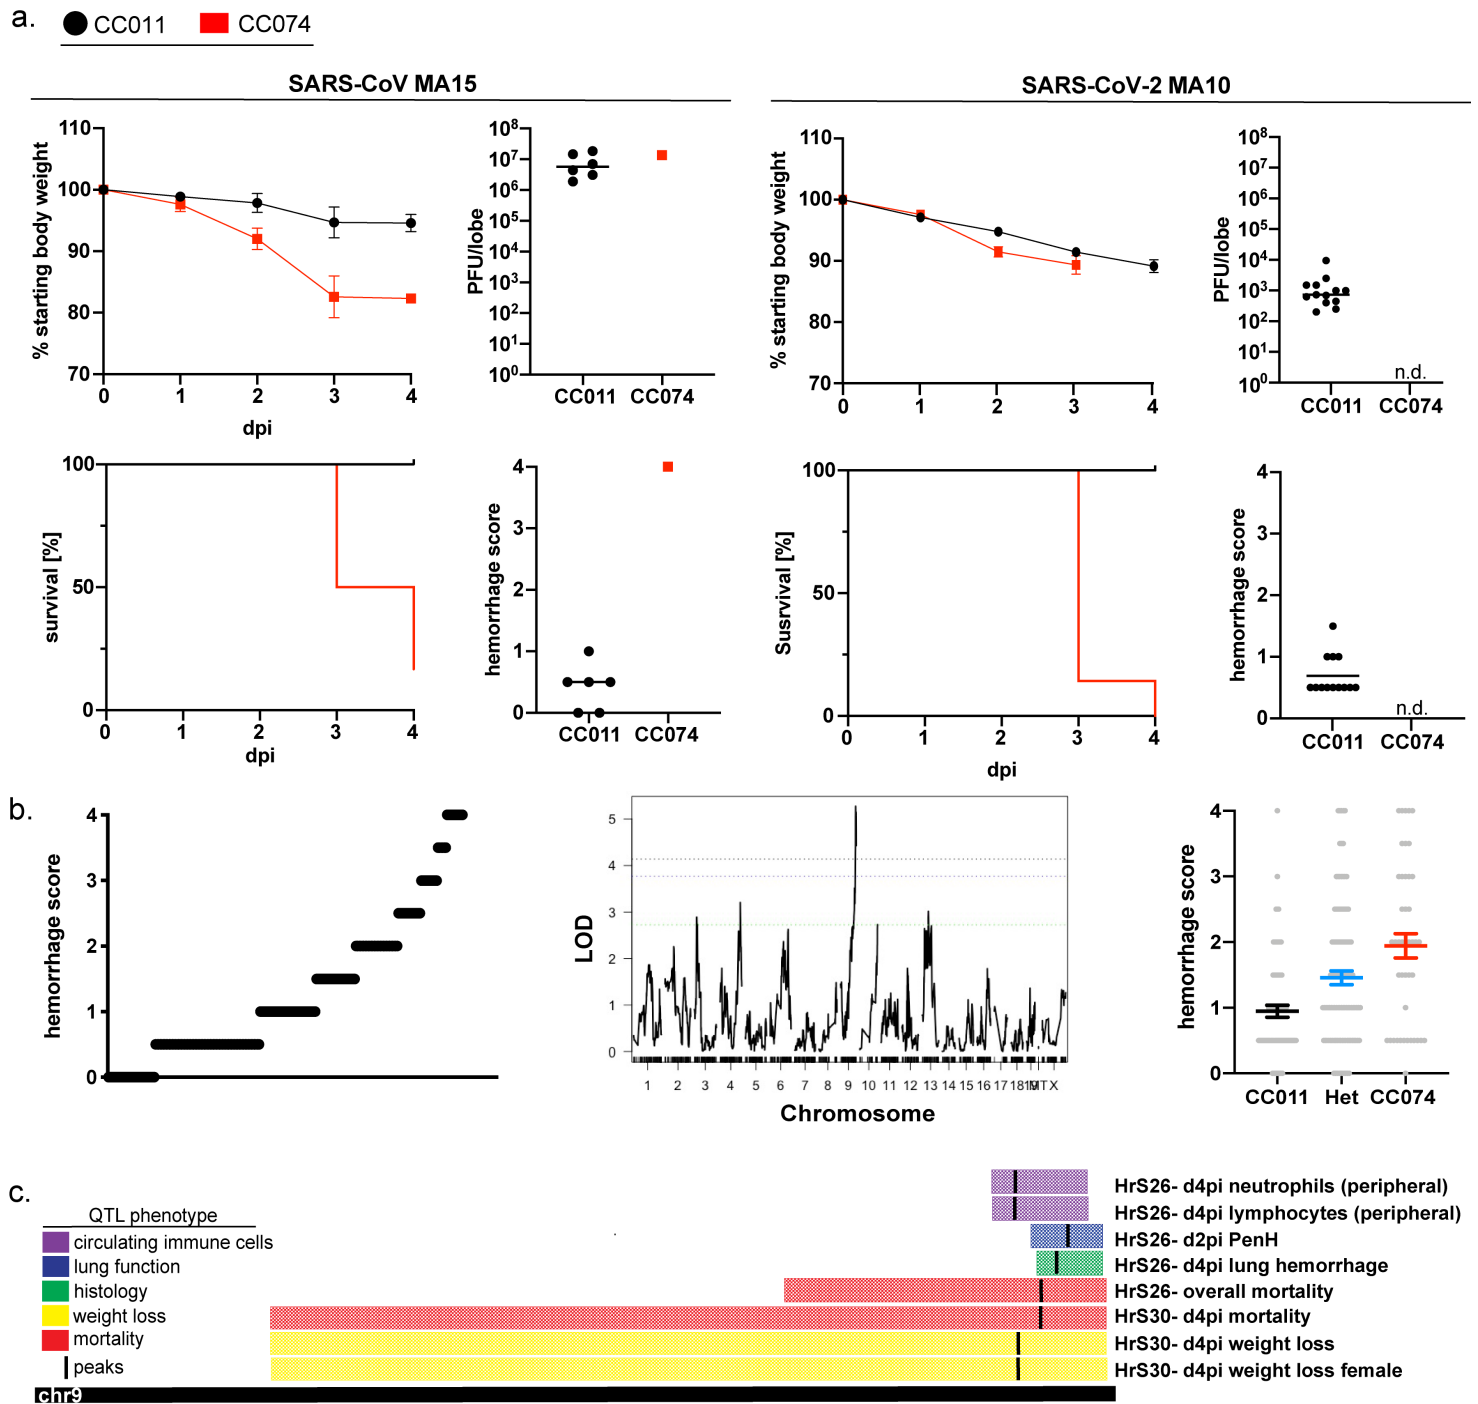



Figure 4

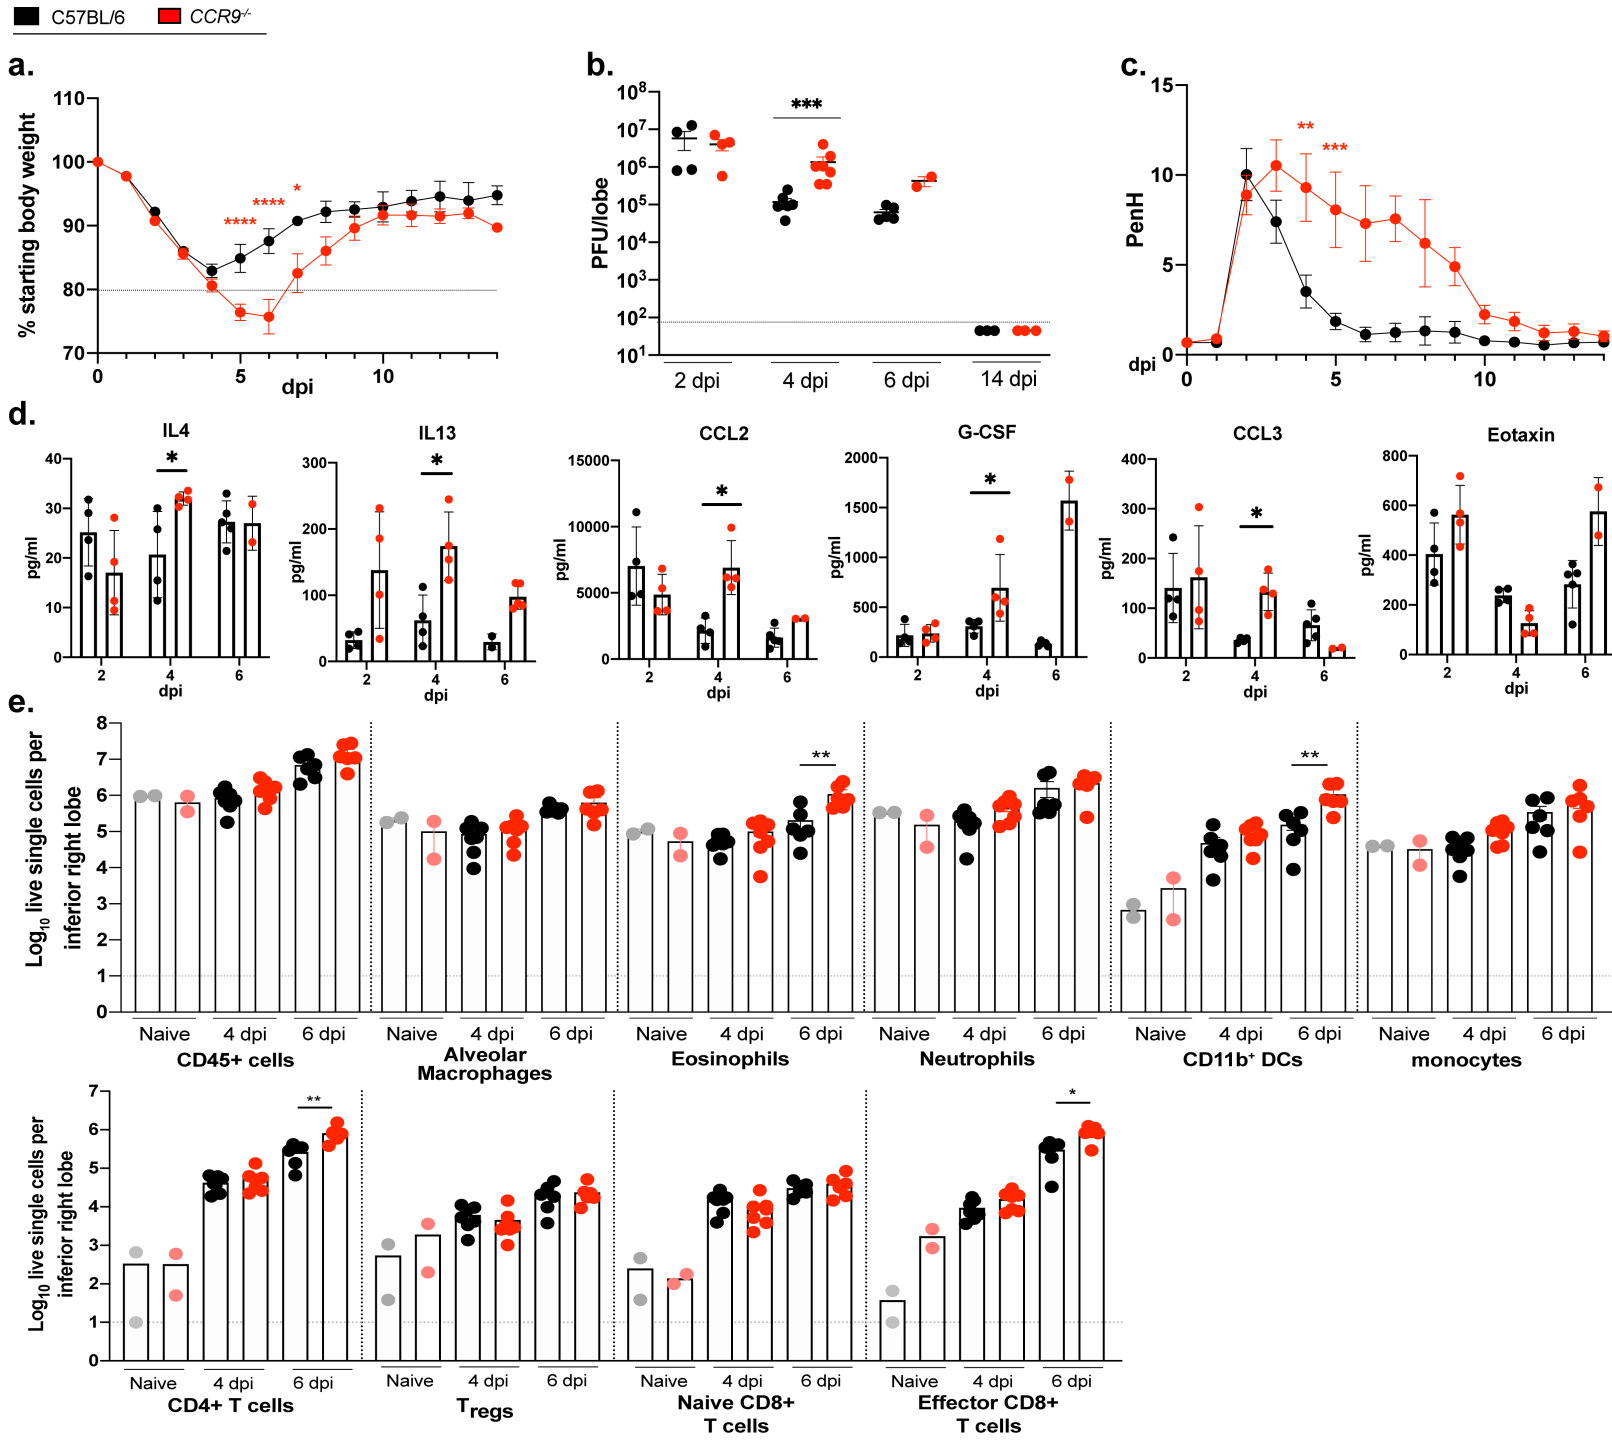

# Figure 5

a. *Hrs23*: CC003xCC053-F2

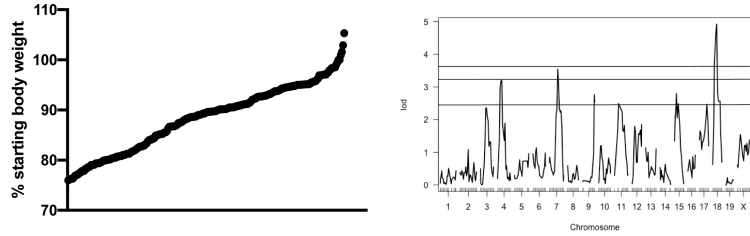

b. *Hrs23*: CC003xCC053-F2

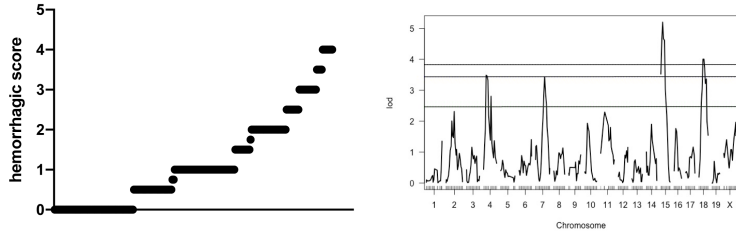

c. *Hrs24*: CC011xCC074-F2

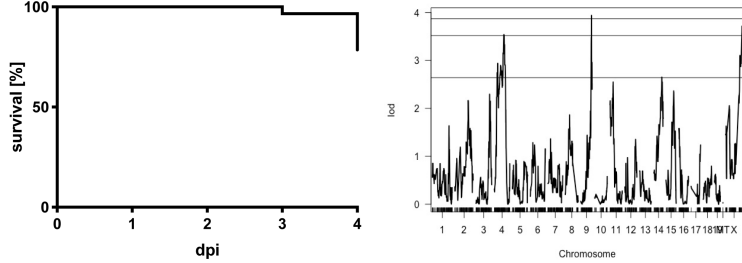

d. ■ C57BL/6 ■ *TRIM14*<sup>Δ47/Δ47</sup>

SARS-CoV MA15

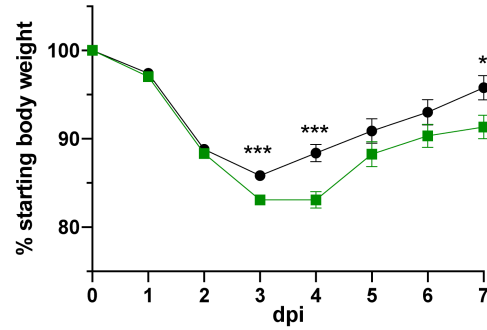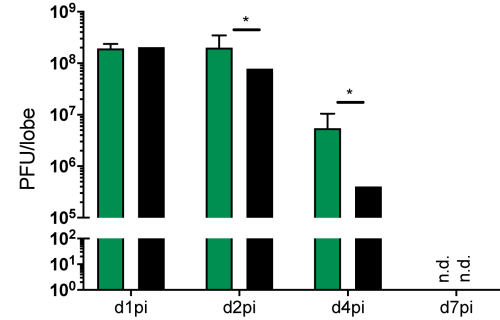

SARS-CoV-2 MA10

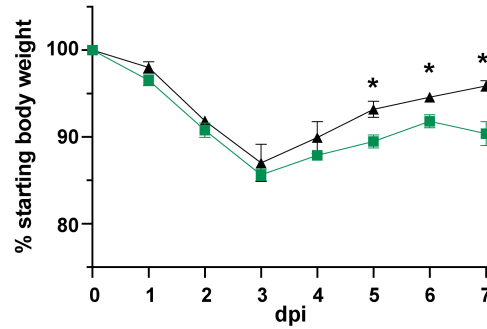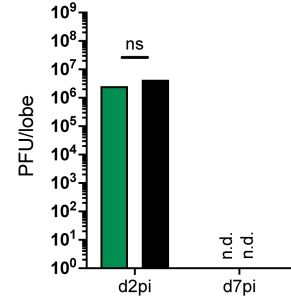

Figure 6

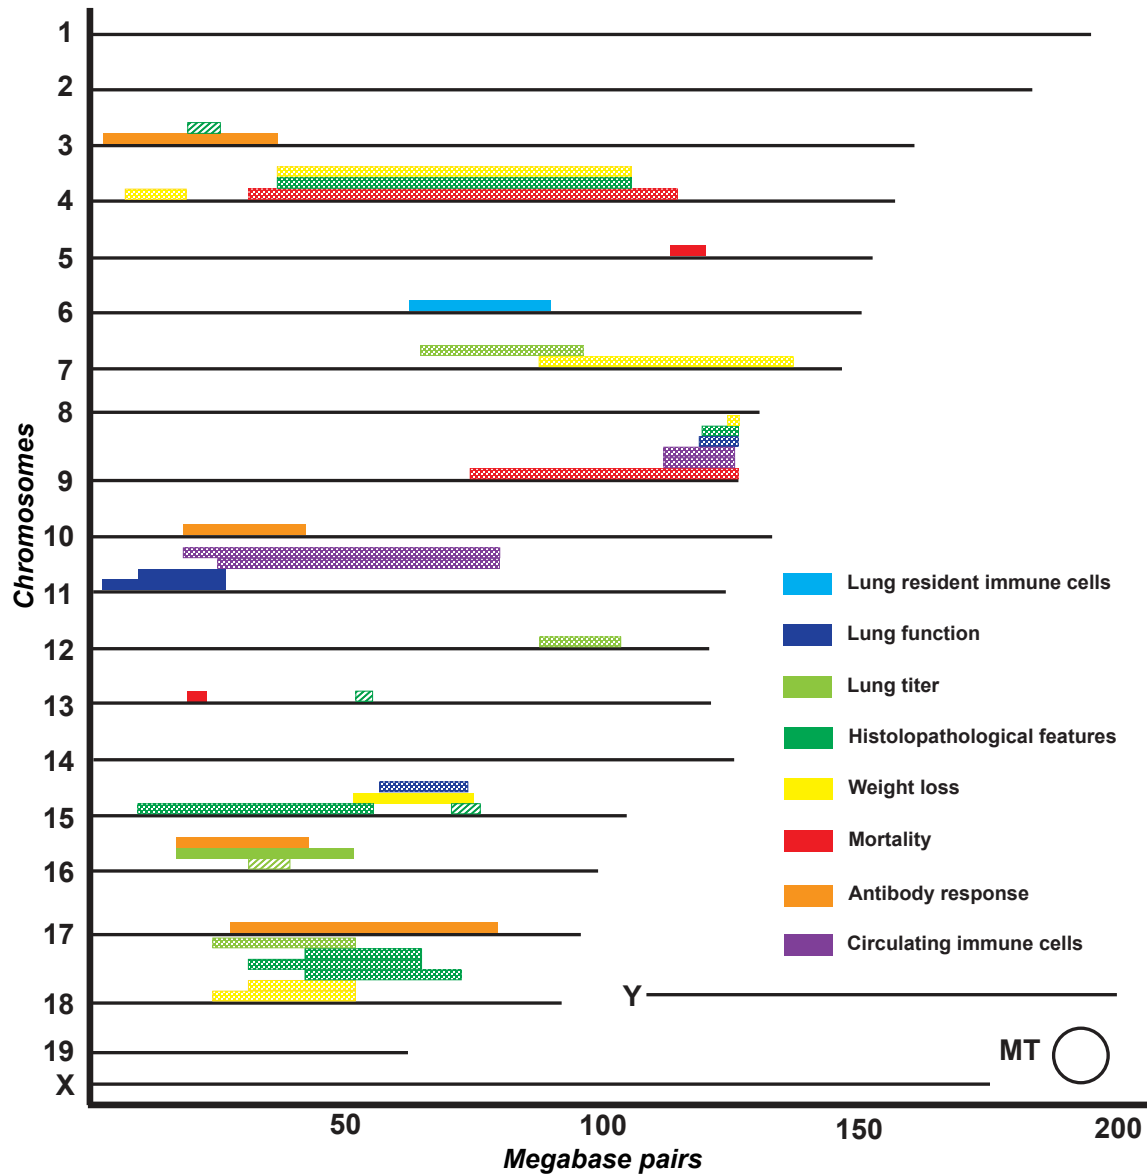

**Table 1**

| QTL ID                | Population     | Chromosome [Mb]                                               | Phenotype(s) (days post infection- dpi)       | Haplotype(s) <sup>+</sup>                  | phenotypic variation [%]             |
|-----------------------|----------------|---------------------------------------------------------------|-----------------------------------------------|--------------------------------------------|--------------------------------------|
| <b>Pre-CC</b>         |                |                                                               |                                               |                                            |                                      |
| <i>HrS1</i>           | Pre-CC         | chr3:18.3-26.8                                                | Perivascular cuffing (4dpi)                   | BH/ACDEFG                                  | 26%                                  |
| <i>HrS2</i>           | Pre-CC         | chr16:31.5-36.7                                               | Viral titer (4dpi)                            | G/ABCDEFH                                  | 22%                                  |
| <i>HrS3</i>           | Pre-CC         | chr15:72.2-76.0                                               | Eosinophilia (4dpi)                           | A/BCDEFGH                                  | 26%                                  |
| <i>HrS4</i>           | Pre-CC         | chr13:52.7-54.9                                               | Perivascular cuffing (4dpi)                   | F/ABCDEGH                                  | 21%                                  |
| <b>CC-RIX</b>         |                |                                                               |                                               |                                            |                                      |
| <i>HrS10</i>          | CC-RIX         | chr13: 20.3- 23.7                                             | HKU3-MA mortality                             | FG/ABCDEH                                  | OR* 6.13                             |
| <i>HrS11</i>          | CC-RIX         | chr5: 112.9-118.8                                             | HKU3-MA mortality                             | C/ABDEFGH                                  | OR* 10.45                            |
| <i>HrS12</i>          | CC-RIX         | chr15: 51.5- 75.6                                             | HKU3-MA weight loss (4dpi)                    | G/ABCDEFH                                  | 3.4%                                 |
| <i>HrS13</i>          | CC-RIX         | chr16:18-51.1                                                 | SARS viral titer (2dpi)                       | C/G/ABDEFH                                 | 15.94%                               |
| <i>HrS14</i>          | CC-RIX         | chr11: 9.05- 28.66                                            | PenH (2dpi)                                   | D/CEH/ABFG                                 | 11.65%                               |
| <i>HrS15</i>          | CC-RIX         | chr11: 3.26- 28                                               | Rpef (4dpi)                                   | ABCEFGH/D                                  | 6.48%                                |
| <i>HrS17</i>          | CC-RIX         | chr17: 27.4- 78.3<br>chr17: 27.4- 78.3                        | IgG1 (N) (32dpi)<br>Total IgG (N) (32dpi)     | A/BCDEFH/G                                 | 19.97%<br>18.53%                     |
| <i>HrS18</i>          | CC-RIX         | chr16: 18.1- 43.8                                             | Total IgG (N) (32dpi)                         | ABCDEFH/G                                  | 22.75%                               |
| <i>HrS19</i>          | CC-RIX         | chr10: 17.4- 130.5                                            | Total IgG (N) (32dpi)                         | ABCDEH/FG                                  | 10.71%                               |
| <i>HrS20</i>          | CC-RIX         | chr3: 3.1- 35.4                                               | Total IgG (N) (32dpi)                         | G/ABCDEFH                                  | 10.83%                               |
| <i>HrS22</i>          | CC-RIX         | chr6:67.2- 85                                                 | CD8 <sup>+</sup> DCs [%] (4dpi)               | F/ABCDEGH                                  | 8.17%                                |
| <b>CC011xCC074-F2</b> |                |                                                               |                                               |                                            |                                      |
| <i>HrS24</i>          | CC011xCC074-F2 | chr4:32.95-114.54                                             | Mortality                                     | CC011: G,H,C<br>CC074:A/H,<br>A/D, D, E, F | OR* 4.34                             |
| <i>HrS25</i>          | CC011xCC074-F2 | chr4: 6.38-17.97                                              | Weight loss in males (4dpi)                   | CC011: G, B<br>CC074: A                    | 12.57%                               |
| <i>HrS26</i>          | CC011xCC074-F2 | chr9:74.94-124.06<br>chr9:117.38-124.07<br>chr9:116.24-124.07 | Mortality<br>Hemorrhage (4dpi)<br>PenH (2dpi) | CC011: B, G<br>CC074: A                    | OR* 3.15<br>10.24%<br>7.76%<br>11.8% |

|                       |                |                                                                                                                                                   |                                                                                                                                    |                                              |                |
|-----------------------|----------------|---------------------------------------------------------------------------------------------------------------------------------------------------|------------------------------------------------------------------------------------------------------------------------------------|----------------------------------------------|----------------|
|                       |                | chr9:111.54-122.63                                                                                                                                | Periph. neutrophils (4dpi)                                                                                                         |                                              | 12.39%         |
|                       |                | chr9:111.54-122.63                                                                                                                                | Periph. lymphocytes (4dpi)                                                                                                         |                                              |                |
| <i>HrS27</i>          | CC011xCC074-F2 | chr11:26.44-80.76<br>chr11:17.89-80.76                                                                                                            | Periph. neutrophils (4dpi)<br>periph. lymphocytes (4dpi)                                                                           | CC011: H, B, H<br>CC074: C                   | 5.5%<br>5.6%   |
| <i>HrS28</i>          | CC011xCC074-F2 | chr15:58.66-74.04                                                                                                                                 | PenH (2dpi)                                                                                                                        | CC011: H<br>CC074: B                         | 8.48%          |
| <b>CC003xCC053-F2</b> |                |                                                                                                                                                   |                                                                                                                                    |                                              |                |
| <i>HrS5</i>           | CC003xCC053-F2 | chr18:24.76-51.25<br>chr18:31.63-51.25<br>chr18:42.85-73.43<br>chr18:31.63-65.17<br>chr18:42.85-65.17<br><br>chr18:24.76-51.2<br>chr18:24.76-51.2 | Weight loss (3dpi)<br>Weight loss (4dpi)<br>Hemorrhage (4dpi)<br>Perivascular cuffing (4dpi)<br>Edema (4dpi)<br>Viral titer (4dpi) | CC003: A, G<br>CC053: C/G, G, B, B/D, B/C, D | 6%-13.2%       |
| <i>HrS6</i>           | CC003xCC053-F2 | chr9:121.77-end                                                                                                                                   | Weight loss (3dpi)                                                                                                                 | CC003: B, B/D<br>CC053: H                    | 7%             |
| <i>HrS7</i>           | CC003xCC053-F2 | chr7:83.45-129.93<br>chr7:69.79-96.66                                                                                                             | Weight loss (4dpi)<br>Viral titer (4dpi)                                                                                           | CC003: B, C, B/C<br>CC053: G/H, H, D         | 6.8%<br>14.4%  |
| <i>HrS8</i>           | CC003xCC053-F2 | chr12:88.54-103.21                                                                                                                                | Viral titer (4dpi)                                                                                                                 | CC003: D<br>CC053:F/H                        | 4.27%          |
| <i>HrS9</i>           | CC003xCC053-F2 | chr15:10.7-57.3                                                                                                                                   | Hemorrhage (4dpi)                                                                                                                  | CC003: G, E/G, G<br>CC053: D, C, F           | 9.4%           |
| <i>HrS23</i>          | CC003xCC053-F2 | chr4:35.61-104.04<br>chr4:35.61-104.04                                                                                                            | Hemorrhage (4dpi)<br>Weigh loss (4dpi)                                                                                             | CC003: H, E, G, H<br>CC053: F, G, F          | 6.86%<br>6.22% |

\*QTL influencing mortality calculate an Odds Ratio (OR) for disease rather than a % of variation explained. For both the CC-RIX and the CC-F2, Odds Ratios for specific loci are calculated with a full model of all mortality loci, to better estimate their independent effects.

\*Haplotype effects are described for each QTL. For the Pre-CC and CC-RIX, the haplotypes are separated based on the allele effect splits between founder haplotypes (A=A/J, B=C57BL/6J, C=129S1/SvImJ, D=NOD/ShiLtJ, E=NZO/HiLtJ, F=CAST/EiJ, G=PWK/PhJ, H=WSB/EiJ). In CC-F2 crosses, the haplotypes listed are those present in the given parent strains from the proximal to distal ends of each region

Figure S1

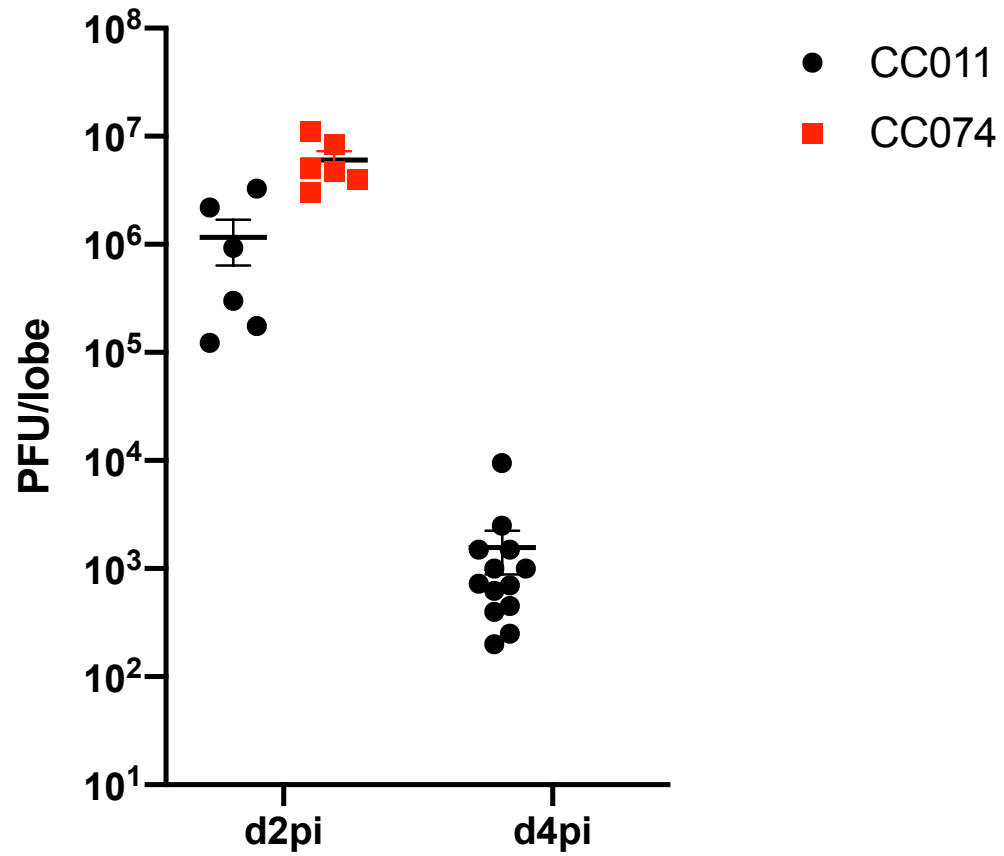

Figure S2

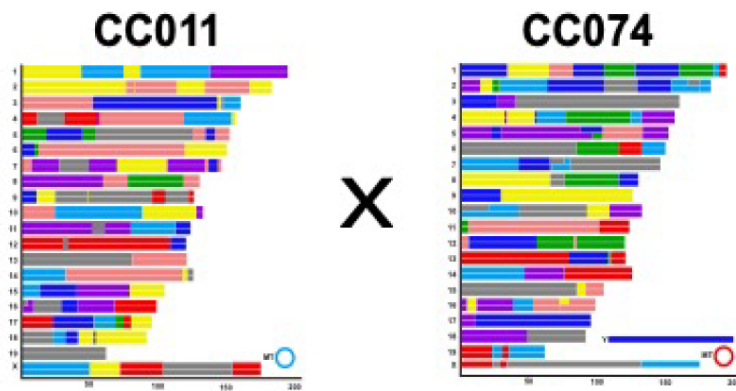

**F1 generation**

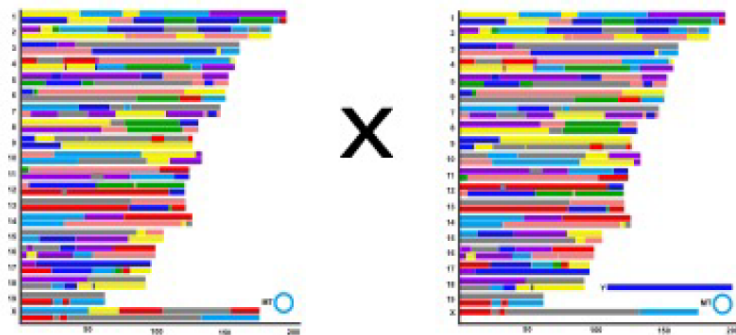

**F2 generation**

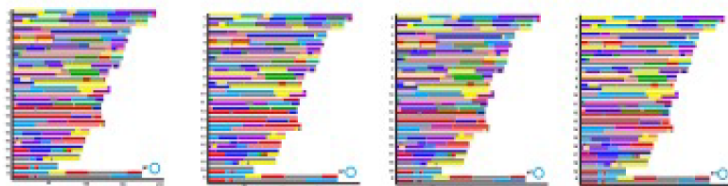

Figure S3

a.

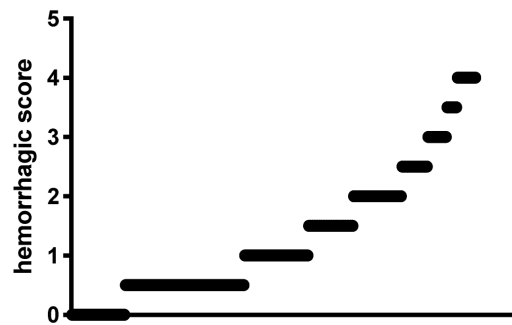

b.

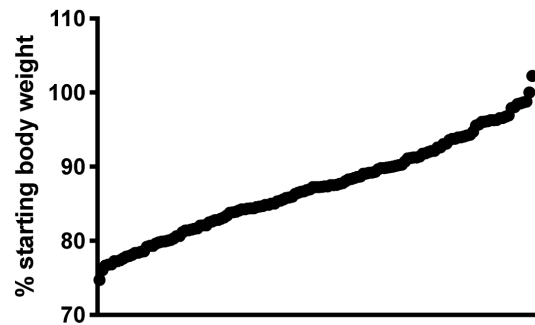

c.

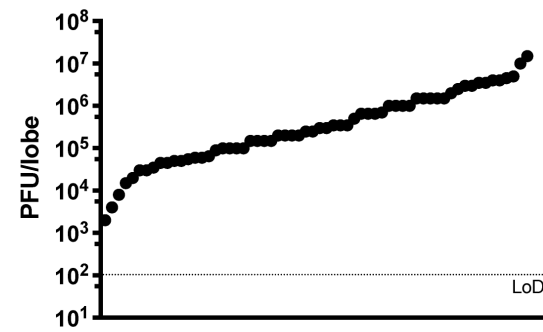

d.

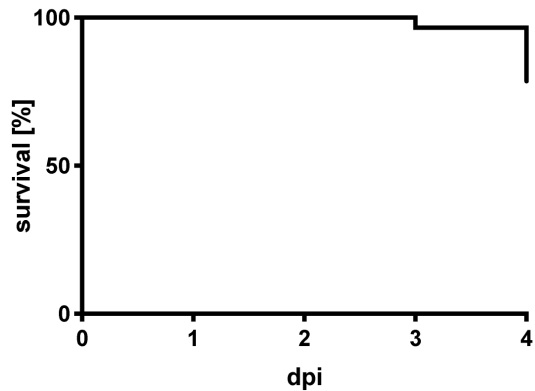

e.

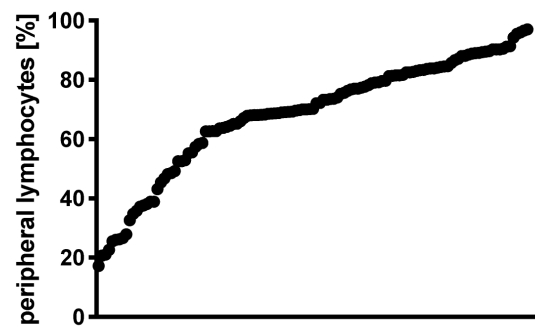

f.

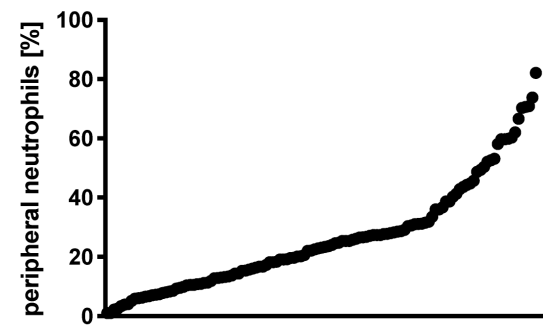

g.

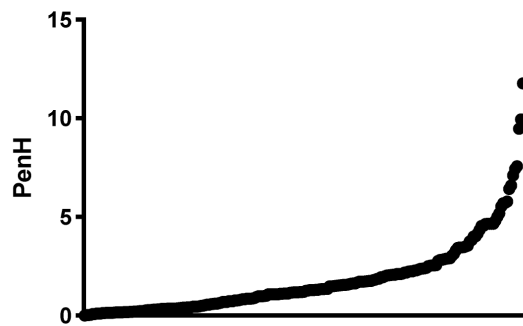



Figure S4

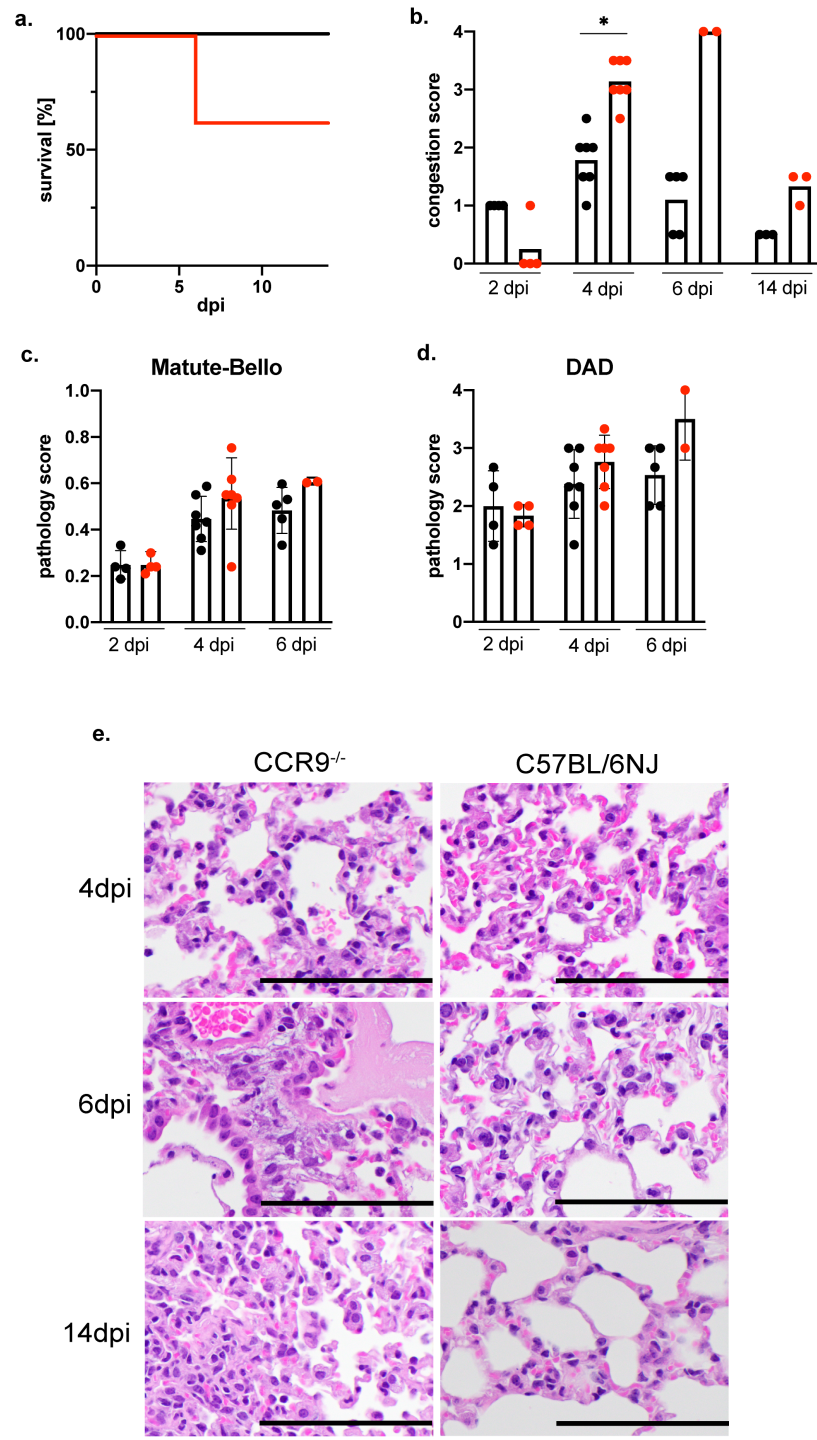

# Figure S5

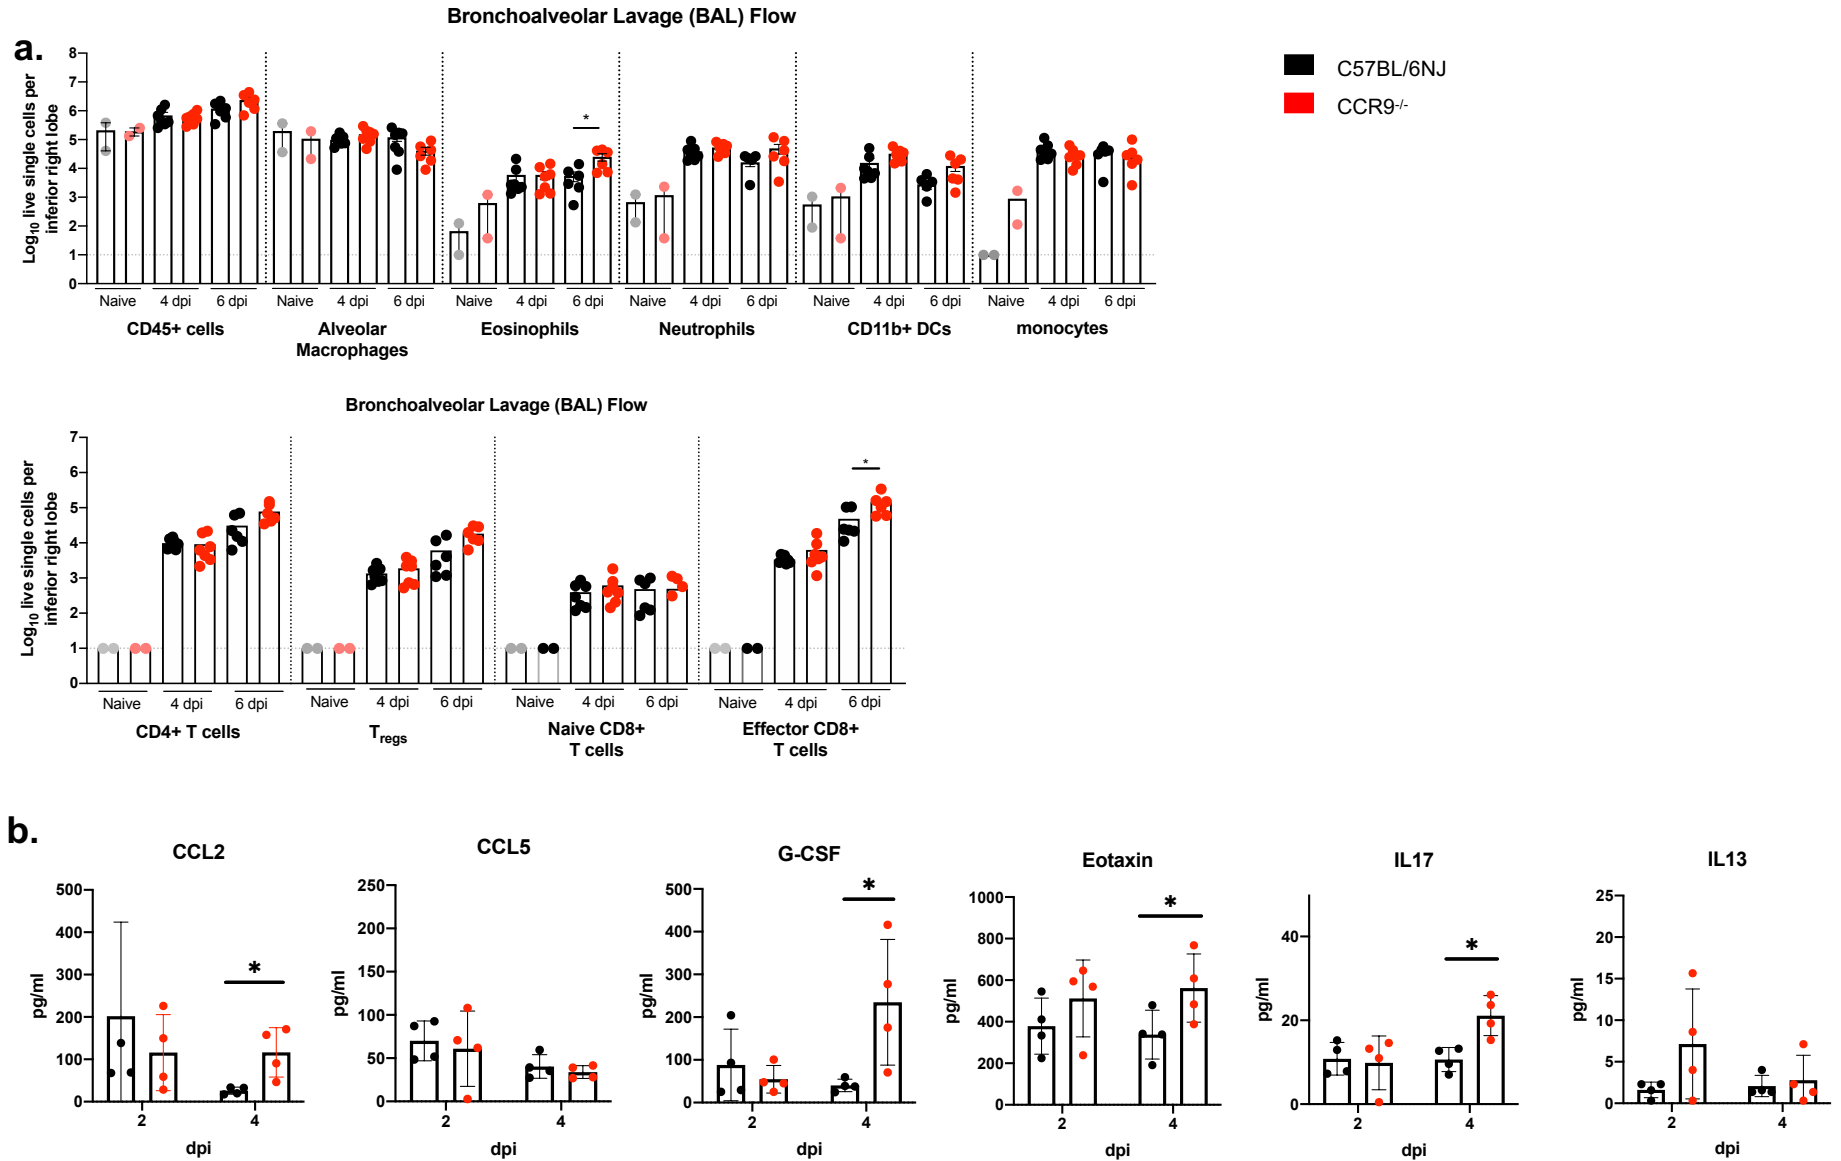

Figure S6

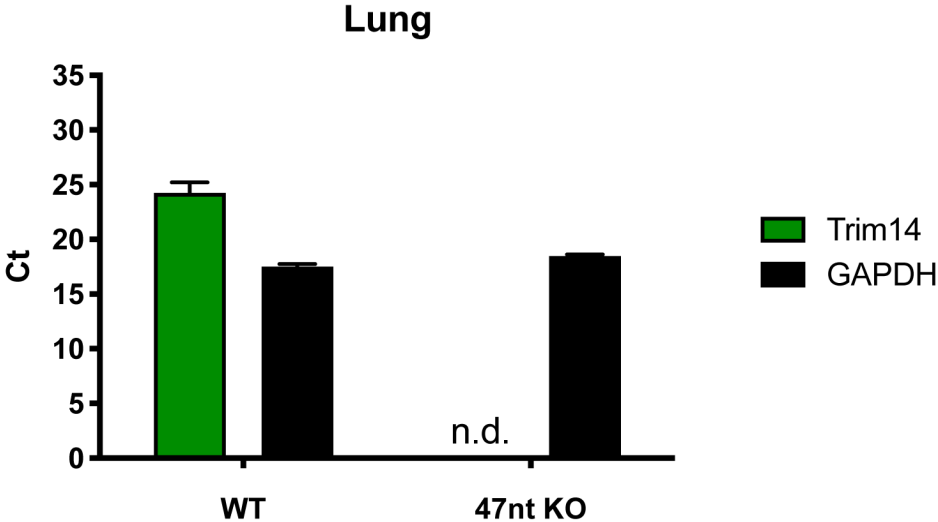

Figure S7

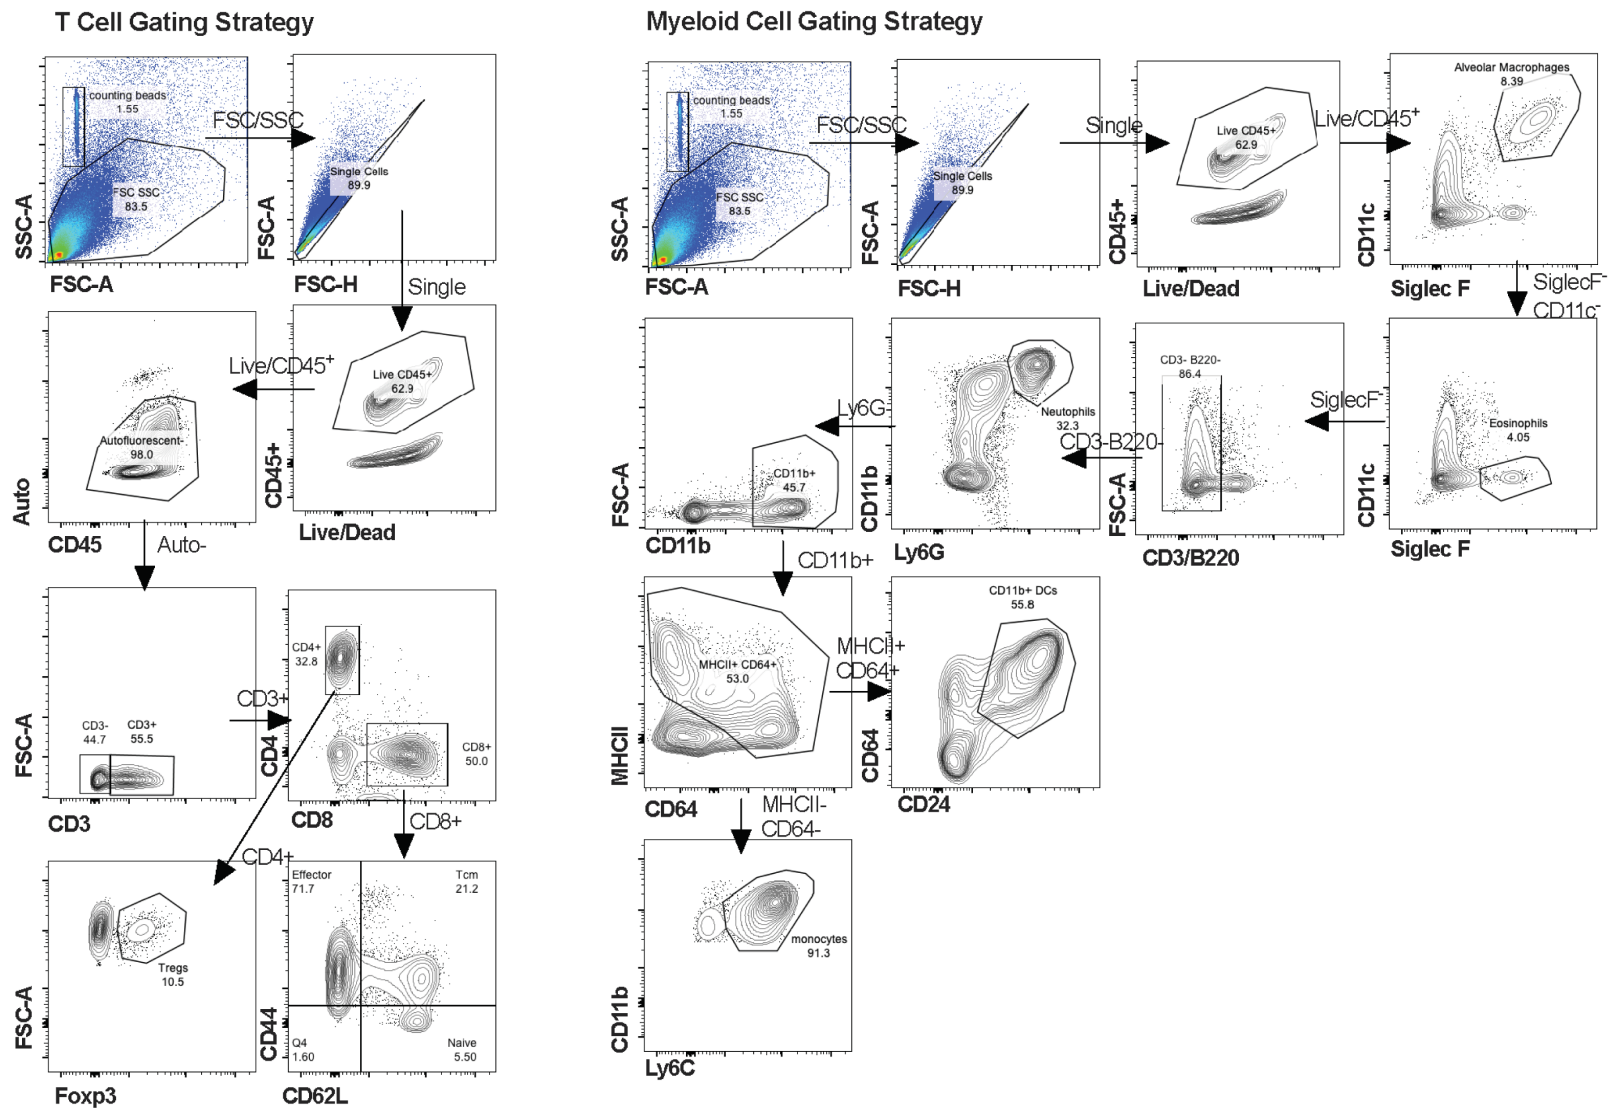

**Table S1**

| QTL ID                                                                                                                                                                                                                                                                                             | Chromosome [Mb]     | Phenotype(s) (days post infection – dpi)                                           | Haplotype(s) <sup>+</sup>                                |
|----------------------------------------------------------------------------------------------------------------------------------------------------------------------------------------------------------------------------------------------------------------------------------------------------|---------------------|------------------------------------------------------------------------------------|----------------------------------------------------------|
| <b>CC011xCC074-F2 suggestive loci</b>                                                                                                                                                                                                                                                              |                     |                                                                                    |                                                          |
| <i>HrS29</i>                                                                                                                                                                                                                                                                                       | chr3: 7.2-159.1     | Mortality (4dpi)<br>Hemorrhage (4dpi)                                              | CC011: C, C/D, D, A, D, E<br>CC074: D, H, B, B/F, B/D, B |
| <i>HrS30</i>                                                                                                                                                                                                                                                                                       | chr9: 28.2-124.1    | Weight loss (4dpi)<br>Mortality (4dpi)<br>Weight loss females (4dpi)               | CC011: B, G, B<br>CC074: A                               |
| <i>HrS31</i>                                                                                                                                                                                                                                                                                       | chr13: 31.9-90.3    | Hemorrhage (4dpi)<br>Periph. monocytes (4dpi)                                      | CC011: B, C<br>CC074: G, D                               |
| <i>HrS32</i>                                                                                                                                                                                                                                                                                       | chr14: 33.8-114.8   | PenH (2dpi)                                                                        | CC011: C<br>CC074: E, H, G                               |
| <i>HrS33</i>                                                                                                                                                                                                                                                                                       | chrX: 6.2- 93.9     | Rpef (2dpi)<br>Periph. neutrophils (2dpi)                                          | CC011: E, C/E, E, A, G<br>CC074: G, B                    |
| <b>CC003xCC053-F2 suggestive loci</b>                                                                                                                                                                                                                                                              |                     |                                                                                    |                                                          |
| <i>HrS34</i>                                                                                                                                                                                                                                                                                       | chr3: 58- 148.4     | Weight loss (3dpi)                                                                 | CC003: B, G, H, G<br>CC053: C/D, C, D, A, E              |
| <i>HrS35</i>                                                                                                                                                                                                                                                                                       | chr17: 6- 79        | Weight loss (3dpi)                                                                 | CC003: C/D, C, C/D, D, B<br>CC053: G, E, G, H, A, G, H   |
| <i>HrS36</i>                                                                                                                                                                                                                                                                                       | chr9: 3.6Mb-74.9Mb  | Weight loss (4dpi),<br>Titer (4dpi),<br>Edema (4dpi)                               | CC003: C, B<br>CC053: B, E                               |
| <i>HrS37</i>                                                                                                                                                                                                                                                                                       | chr10: 5.9Mb-86.3Mb | Titer (4dpi)                                                                       | CC003: C, H<br>CC053: H, B, A                            |
| <i>HrS38</i>                                                                                                                                                                                                                                                                                       | chrX: 9.4Mb-169.5Mb | Titer (4dpi)                                                                       | CC003: C, G, C/G, C/E, C, E<br>CC053: A, C, B, F         |
| <i>HrS39</i>                                                                                                                                                                                                                                                                                       | chr2: 4.3Mb-181.8Mb | mortality (4dpi)                                                                   | CC003: D, B, E<br>CC053: B, E, G, E, A, C, F             |
| <i>HrS41</i>                                                                                                                                                                                                                                                                                       | chr6: 34.2Mb-114Mb  | Interstitial septum (4dpi),<br>Airspace inflammation (dpi4),<br>Eosinophils (4dpi) | CC003: B, E<br>CC053: G, A, A/D, G                       |
| <i>HrS42</i>                                                                                                                                                                                                                                                                                       | chr11: 37Mb-121.6Mb | Edema (4dpi)                                                                       | CC003: A/C, B/C, A/C, B/H, B, E, H, C, E<br>CC053: B     |
| <sup>+</sup> Haplotype effects are described for each QTL. For F2 crosses, the haplotypes listed are those present in the given parent strains from the proximal to distal ends of each region (A=A/J, B=C57BL/6J, C=129S1/SvImJ, D=NOD/ShILtJ, E=NZO/HiLtJ, F=CAST/EiJ, G=PWK/PhJ, H=WSB/EiJ). In |                     |                                                                                    |                                                          |
